# Supplementary material for: Colon cancer subtypes: concordance, effect on survival and selection of the most representative preclinical models
Source: PubMed Central journal article supplement (PMC5111107; doi:10.1038/srep37169), 2016-11-16
Supplement: srep37169-s1.pdf [file srep37169-s1.pdf]

# Colon cancer subtypes: concordance, effect on survival and selection of most representative preclinical models

*Zsófia Sztupinszki, Balázs Győrffy*

## SUPPLEMENTARY MATERIAL

**Supplementary Figure 1.** Individual Kaplan-Meier plots for each classifier in stage 2/3 patients.

**Supplementary Figure 2.** Forest plot for all classifiers in all samples.

**Supplementary Figure 3.** Forest plot for all classifiers in stage II patients.

**Supplementary Figure 4.** Forest plot for all classifiers in stage III patients.

**Supplementary Figure 5.** Individual Kaplan-Meier plots for each classifier in all samples.

**Supplementary Table 1.** Summary of the clinical parameters for each of the datasets included in the analysis.

**Supplementary Table 2.** Inclusion of each gene in each of the classifiers.

**Supplementary Table 3.** Assignment of each of the samples to each of the subtypes.

**Supplementary Table 4.** Cramer's correlation across all samples among all classifiers.

**Supplementary Table 5.** Results of the multivariate analysis.

**Supplementary Table 6.** Designation for each cell line for each suitable classifier.

## TABLE OF CONTENTS

|                                     |           |
|-------------------------------------|-----------|
| <b>Supplementary Figure 1</b> ..... | <b>2</b>  |
| <b>Supplementary Figure 2</b> ..... | <b>24</b> |
| <b>Supplementary Figure 3</b> ..... | <b>25</b> |
| <b>Supplementary Figure 4</b> ..... | <b>26</b> |
| <b>Supplementary Figure 5</b> ..... | <b>27</b> |

**Supplementary Figure 1**  
**Individual Kaplan-Meier plots for each**  
**classifier in stage 2/3 patients.**

21 Kaplan-Meier plots

# Budinska

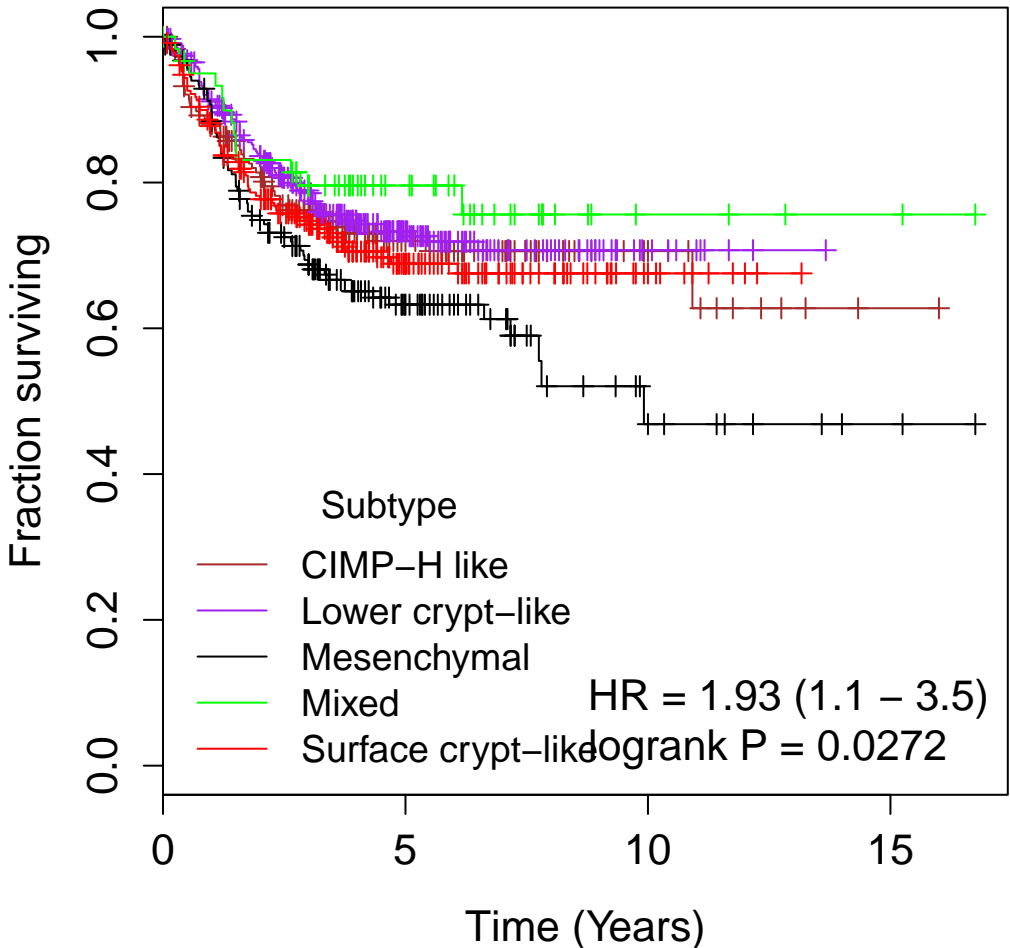

Number at risk

|                    |     |     |    |   |
|--------------------|-----|-----|----|---|
| CIMP-H like        | 184 | 58  | 12 | 1 |
| Lower crypt-like   | 350 | 114 | 12 | 0 |
| Mesenchymal        | 186 | 58  | 9  | 2 |
| Mixed              | 61  | 26  | 4  | 2 |
| Surface crypt-like | 232 | 69  | 10 | 0 |

# CCHS

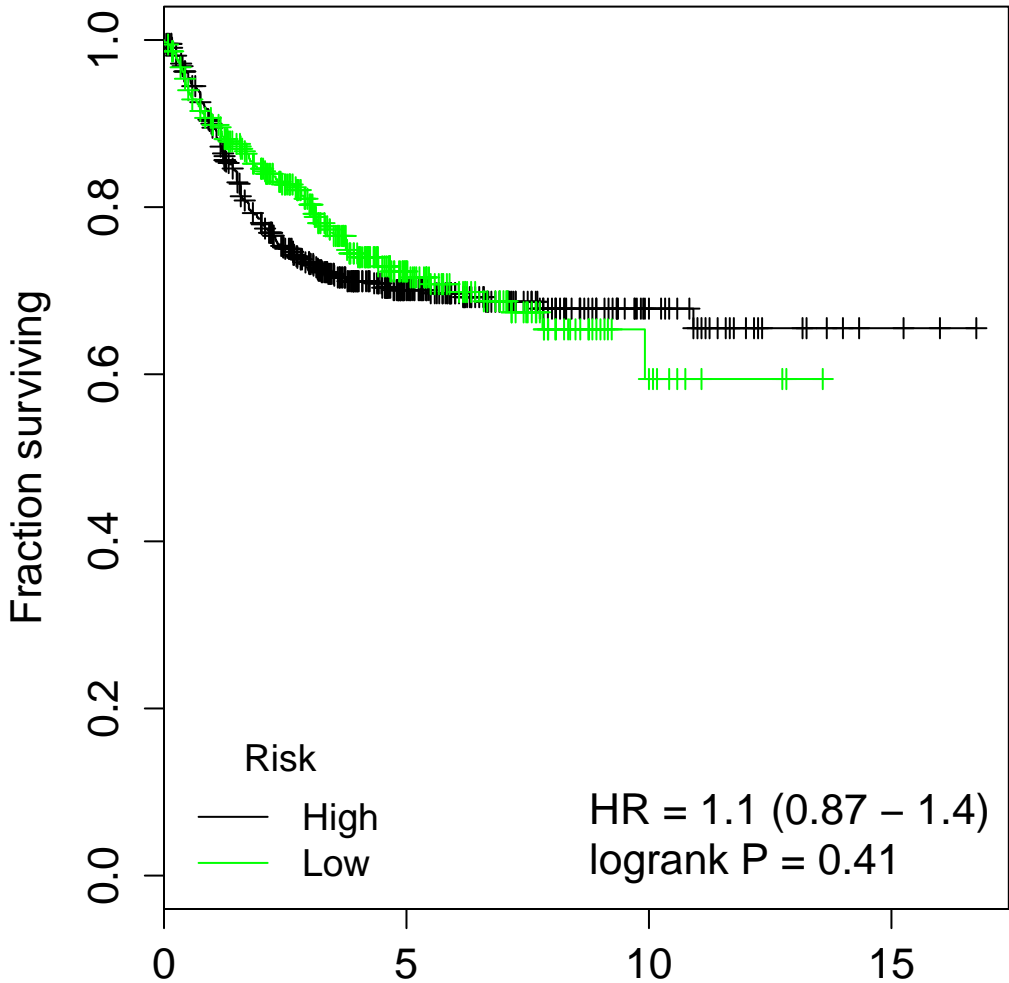

Number at risk

|      |     |     |    |   |
|------|-----|-----|----|---|
| High | 651 | 221 | 37 | 5 |
| Low  | 371 | 103 | 10 | 0 |

# Chang95

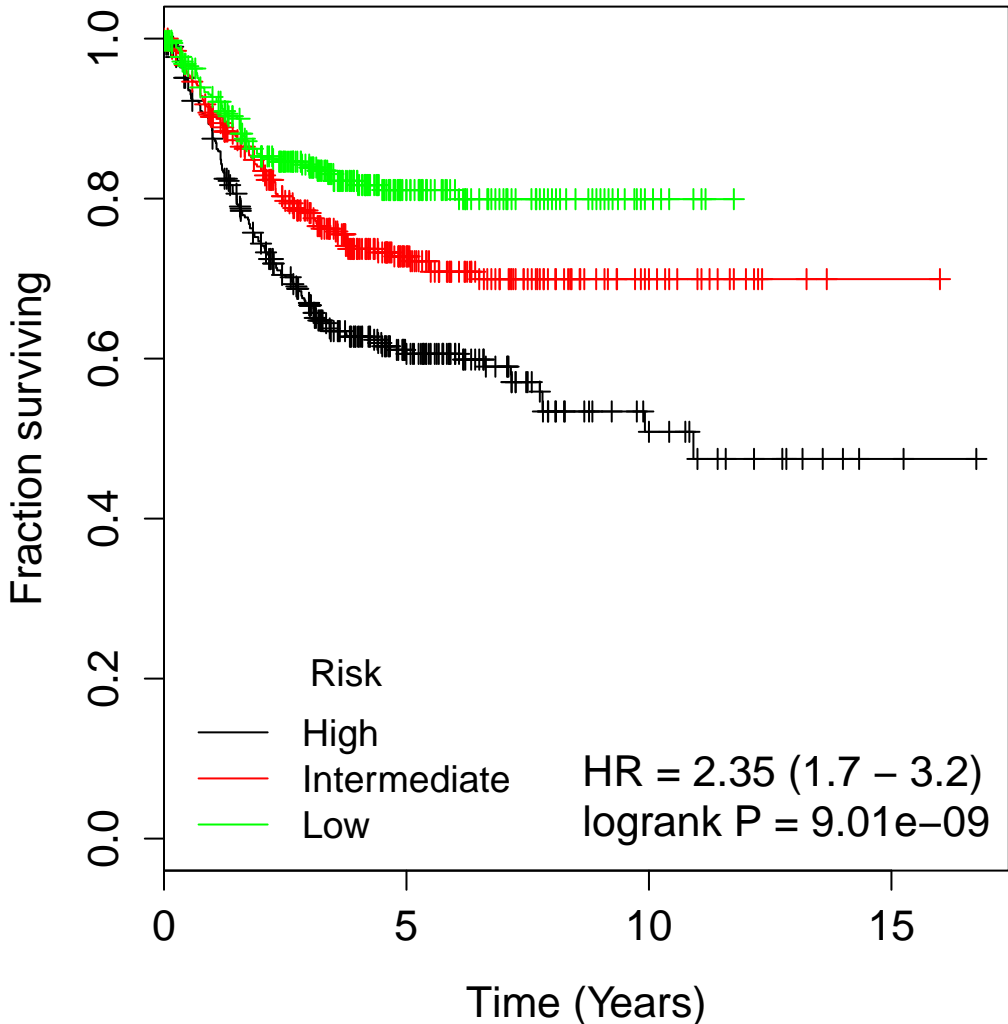

|              | 0   | 5   | 10 | 15 |
|--------------|-----|-----|----|----|
| High         | 395 | 123 | 20 | 4  |
| Intermediate | 395 | 130 | 20 | 1  |
| Low          | 360 | 103 | 7  | 0  |

# CIN25

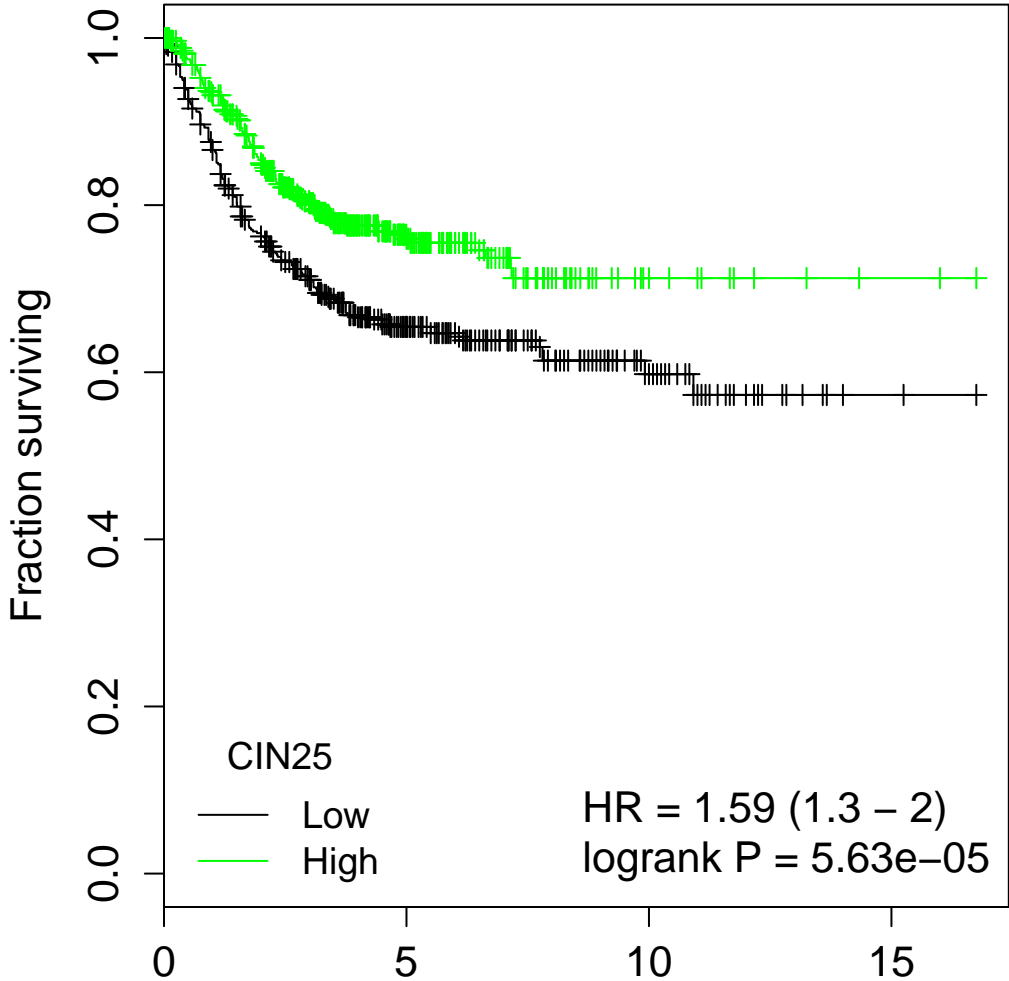

Number at risk

|      |     |     |    |   |
|------|-----|-----|----|---|
| Low  | 545 | 196 | 35 | 3 |
| High | 605 | 160 | 12 | 2 |

# ColoGuideEx

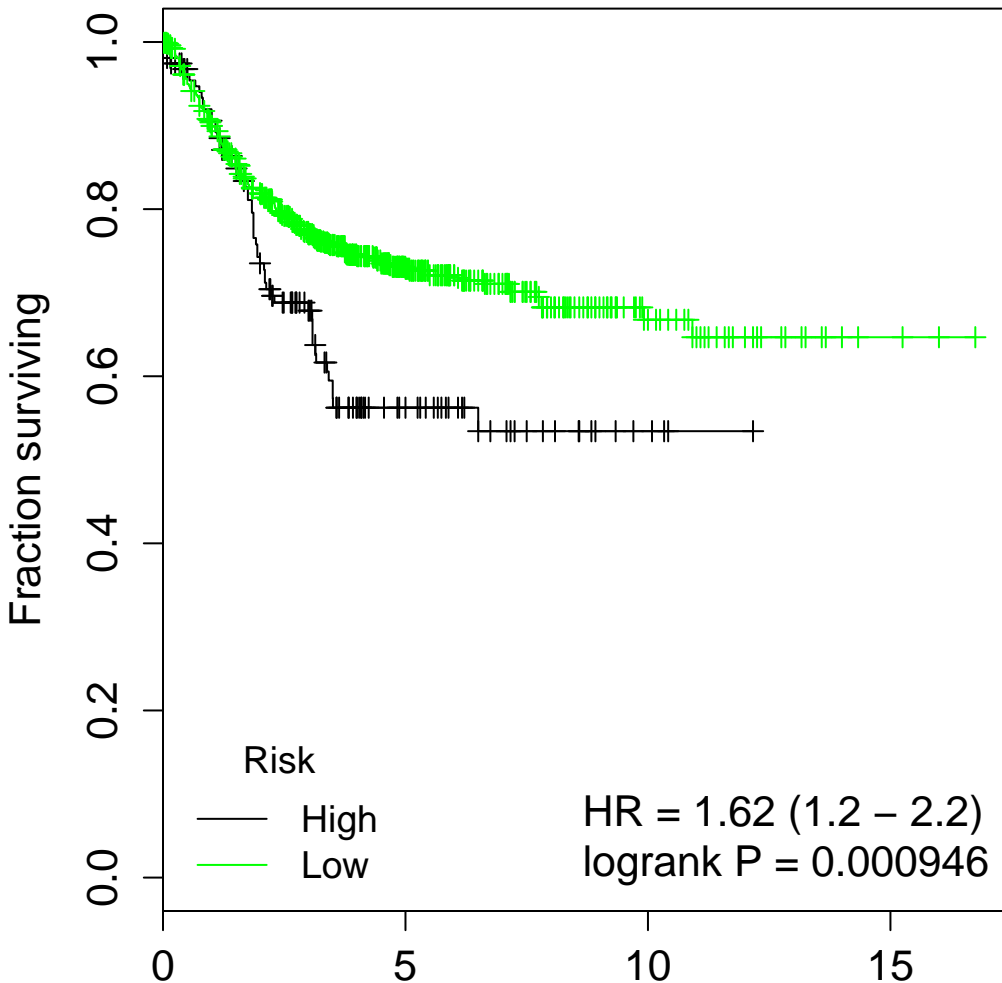

Number at risk

|      |     |     |    |   |
|------|-----|-----|----|---|
| High | 157 | 34  | 4  | 0 |
| Low  | 993 | 322 | 43 | 5 |

# ColoGuidePro

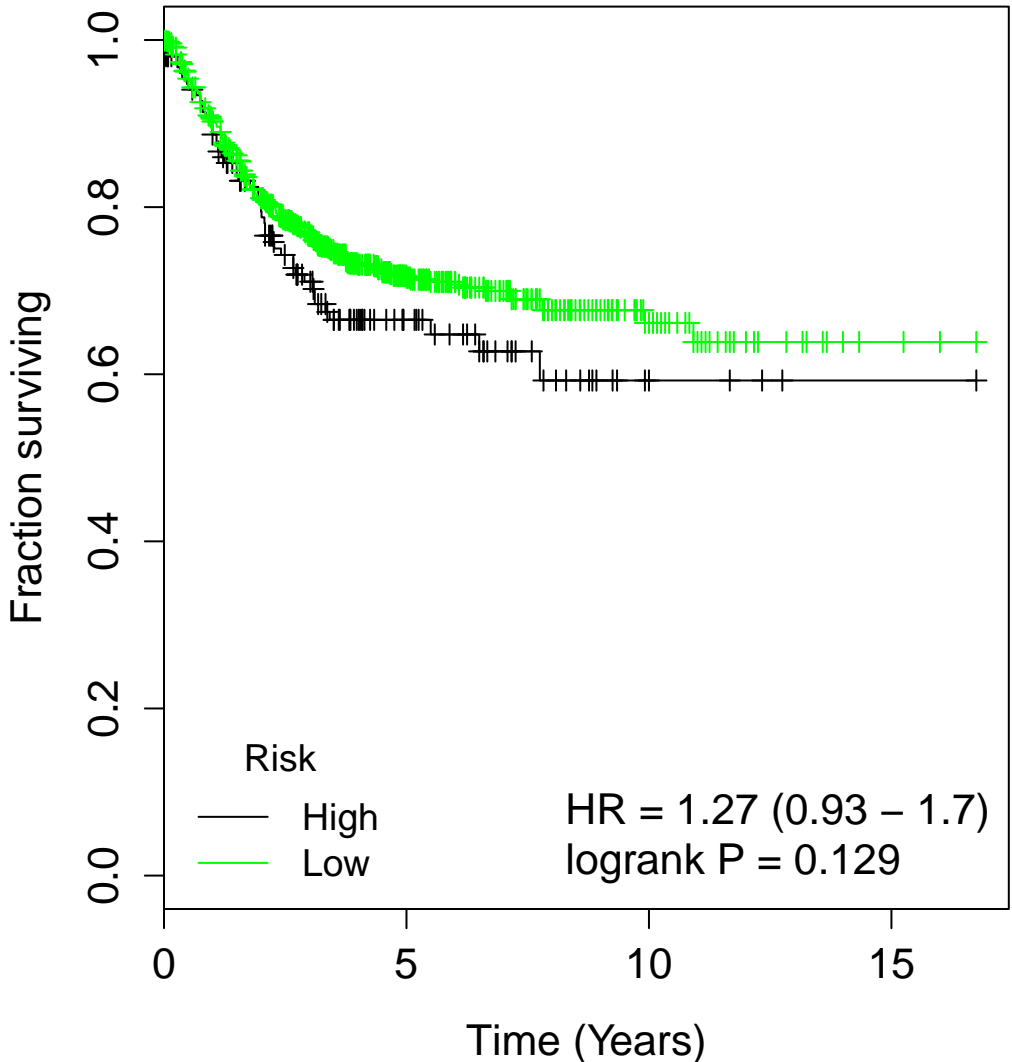

Number at risk

|      |     |     |    |   |
|------|-----|-----|----|---|
| High | 155 | 43  | 5  | 1 |
| Low  | 995 | 313 | 42 | 4 |



# CRCassigner-786

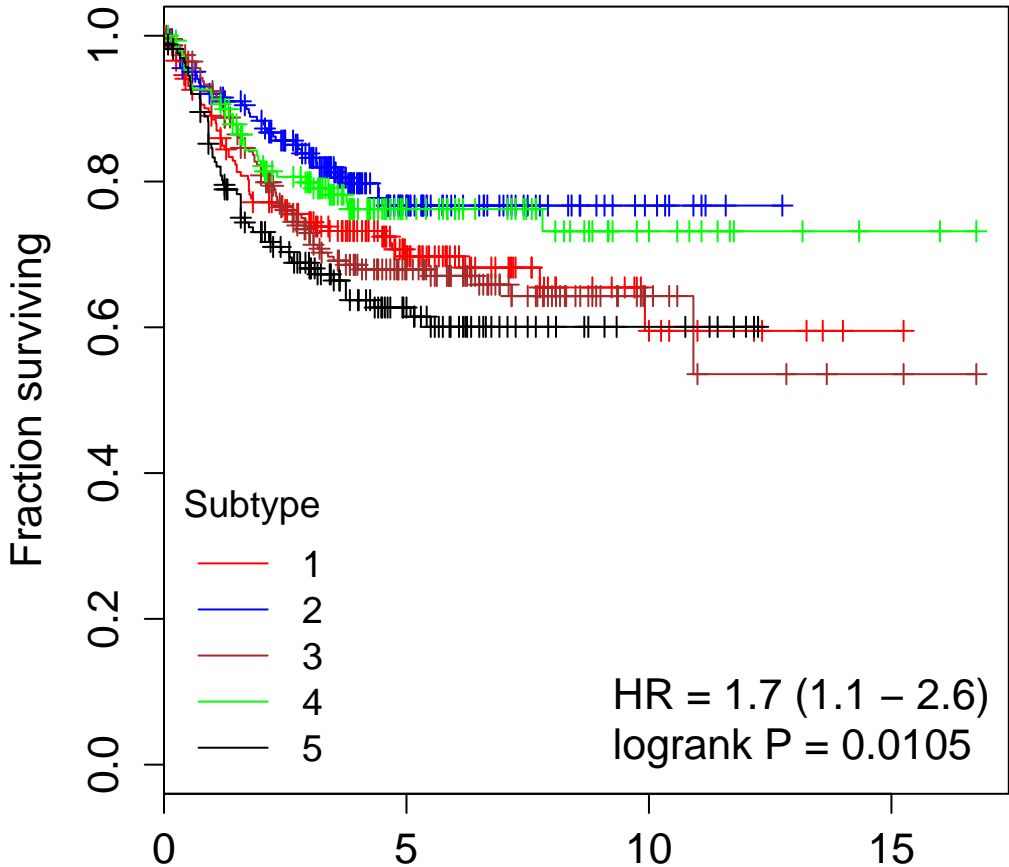

Number at risk

|   |     |    |    |   |
|---|-----|----|----|---|
| 1 | 207 | 74 | 10 | 1 |
| 2 | 207 | 59 | 8  | 0 |
| 3 | 234 | 85 | 9  | 2 |
| 4 | 151 | 51 | 13 | 2 |
| 5 | 166 | 51 | 7  | 0 |

# DeSousa

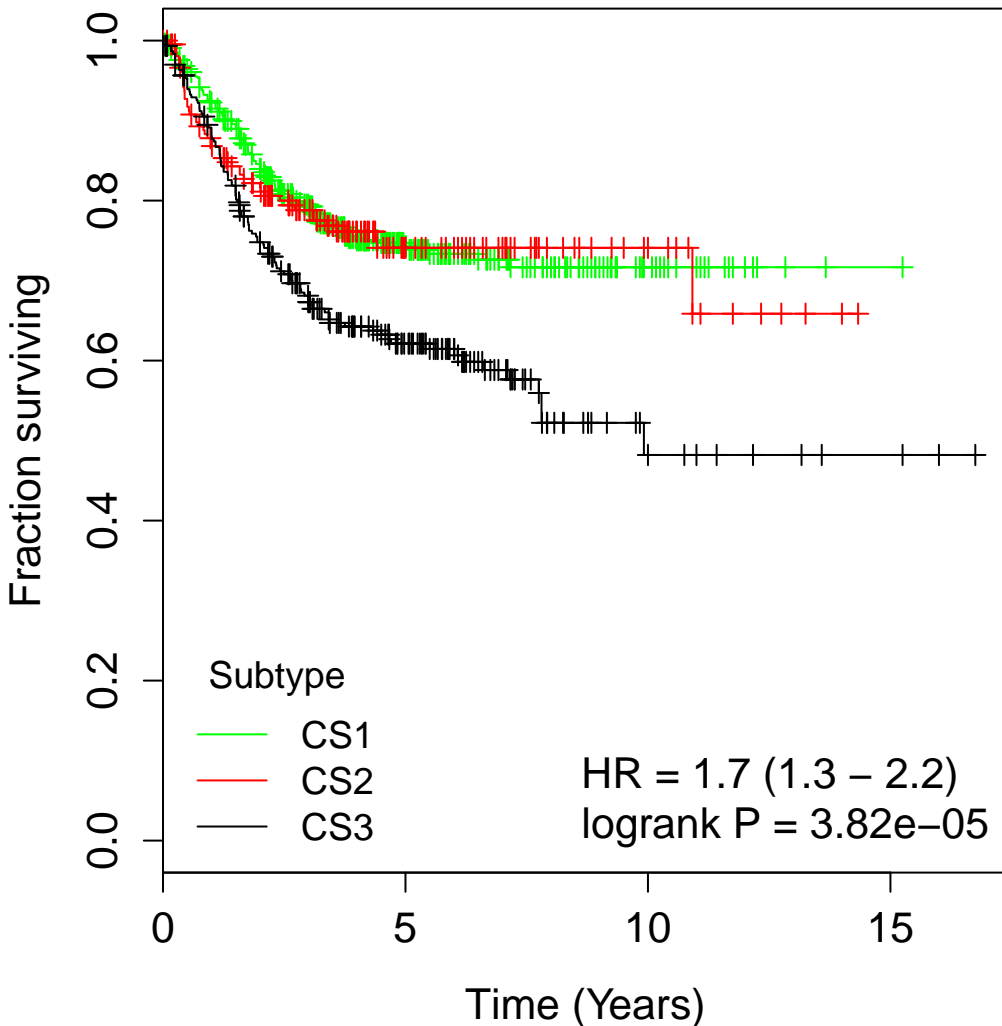

Number at risk

|     |     |     |    |   |
|-----|-----|-----|----|---|
| CS1 | 544 | 177 | 21 | 1 |
| CS2 | 212 | 56  | 14 | 0 |
| CS3 | 304 | 105 | 12 | 4 |

# Marisa

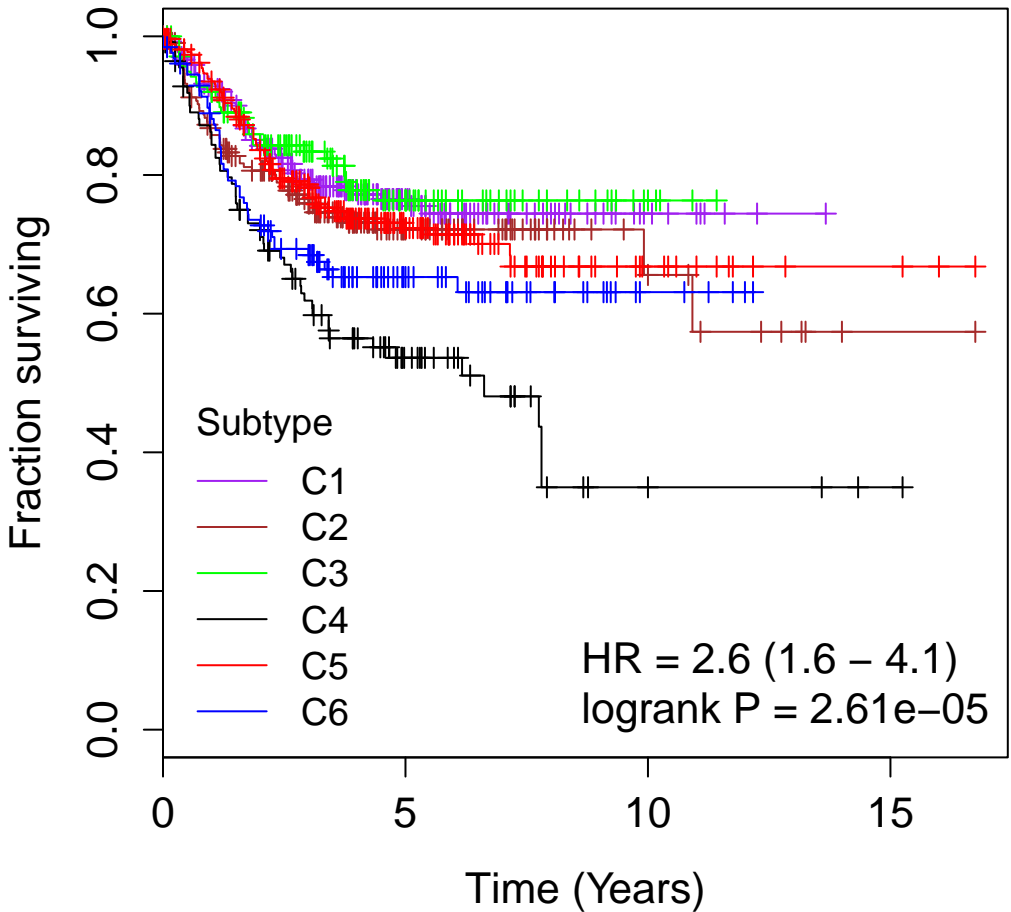

|    | Number at risk |    |    |   |
|----|----------------|----|----|---|
| C1 | 271            | 84 | 9  | 0 |
| C2 | 211            | 57 | 10 | 1 |
| C3 | 140            | 42 | 5  | 0 |
| C4 | 114            | 30 | 4  | 1 |
| C5 | 271            | 98 | 14 | 3 |
| C6 | 128            | 37 | 5  | 0 |

# MDA114

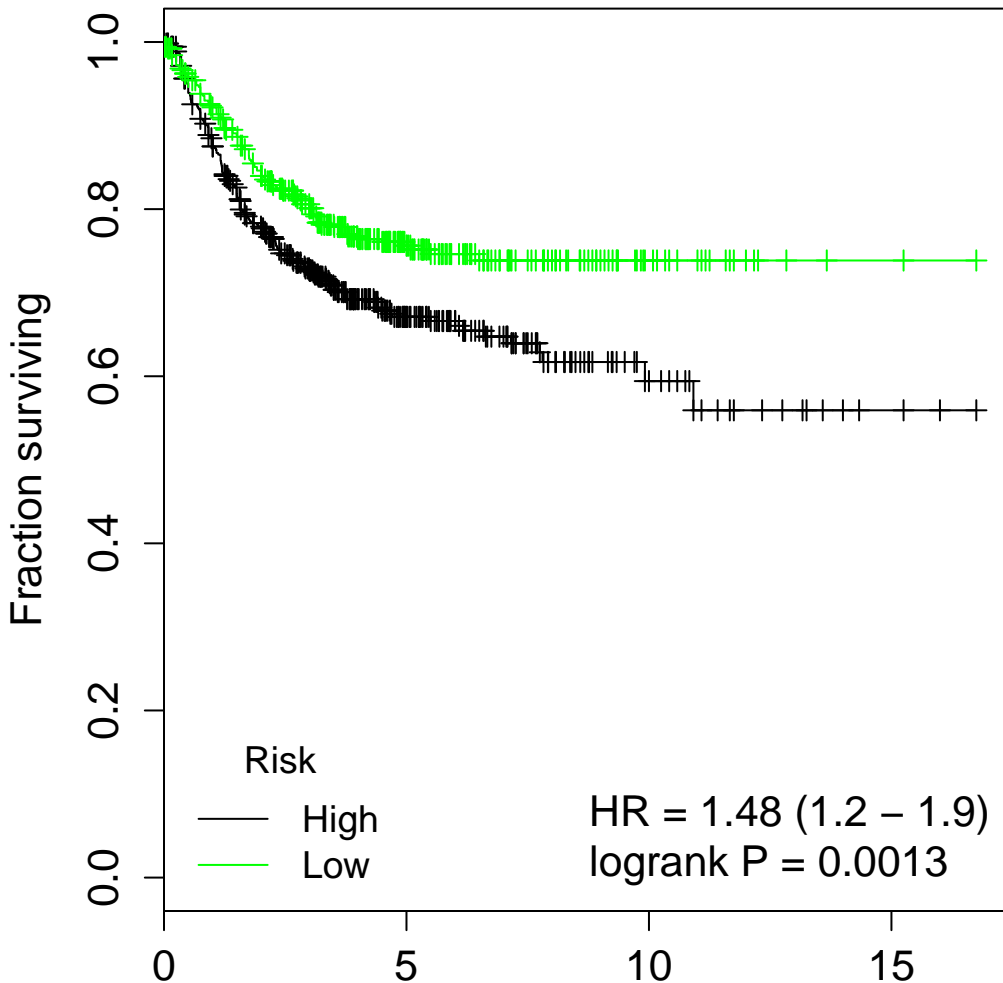

Number at risk

|      |     |     |    |   |
|------|-----|-----|----|---|
| High | 538 | 159 | 25 | 3 |
| Low  | 513 | 172 | 22 | 2 |

# Merlos-EphB2-ISC

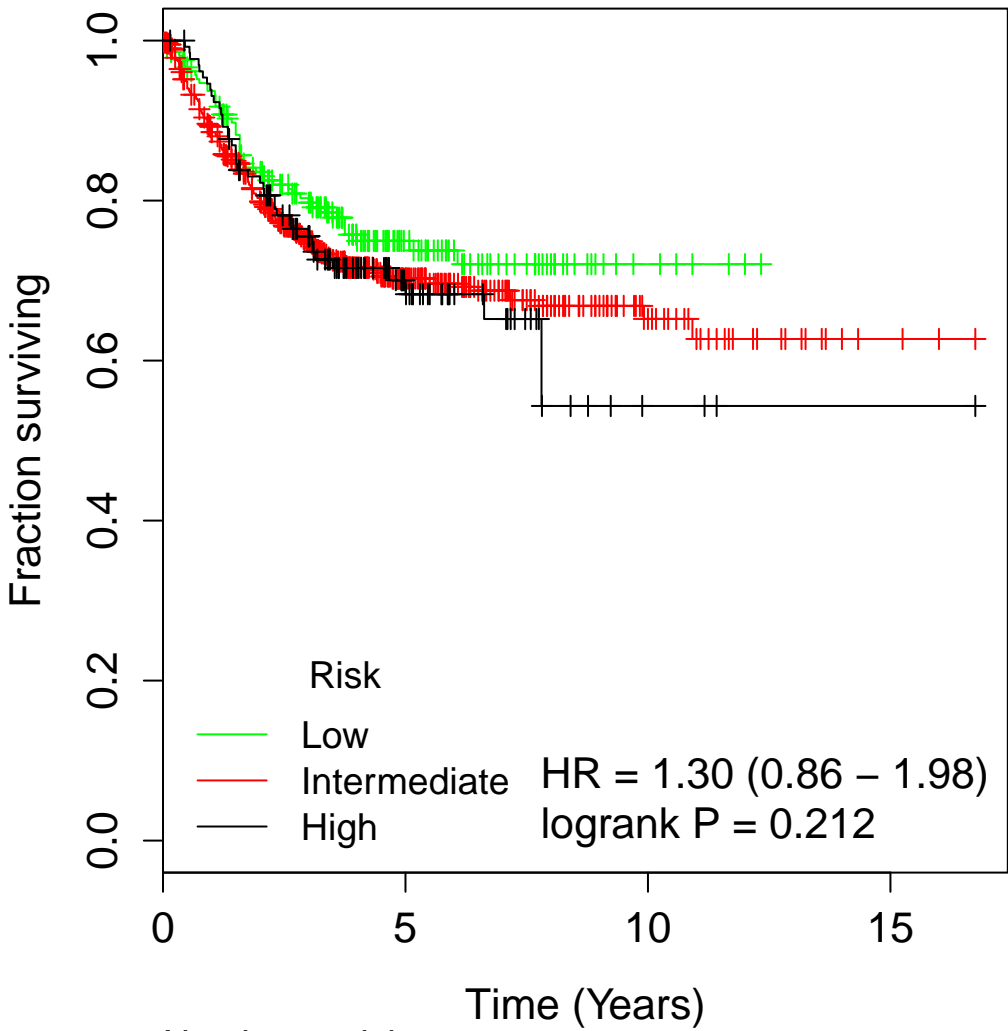

Number at risk

|              |     |     |    |   |
|--------------|-----|-----|----|---|
| Low          | 212 | 64  | 6  | 0 |
| Intermediate | 806 | 252 | 38 | 4 |
| High         | 132 | 40  | 3  | 1 |

# Merlos-Lgr5-ISC

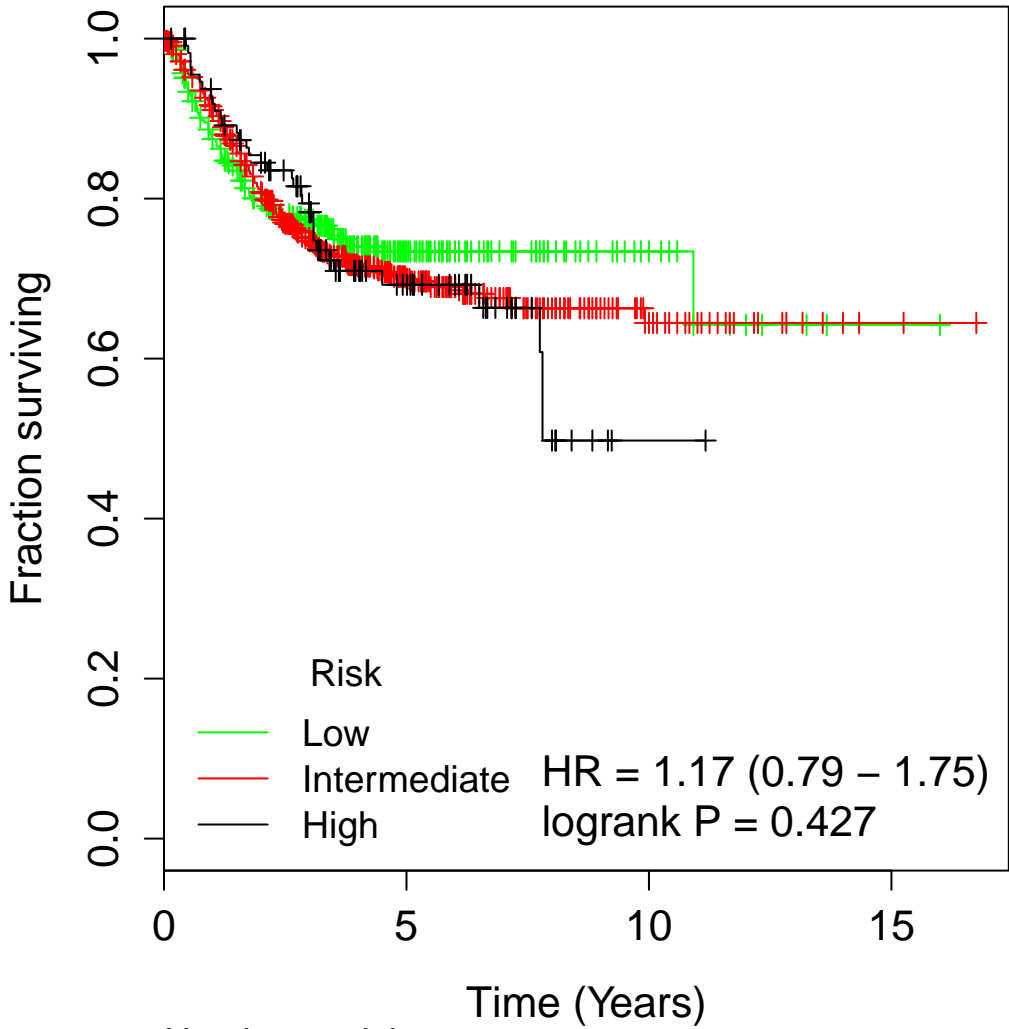

Number at risk

|              |     |     |    |   |
|--------------|-----|-----|----|---|
| Low          | 353 | 85  | 13 | 1 |
| Intermediate | 683 | 233 | 33 | 4 |
| High         | 114 | 38  | 1  | 0 |

# Meta163

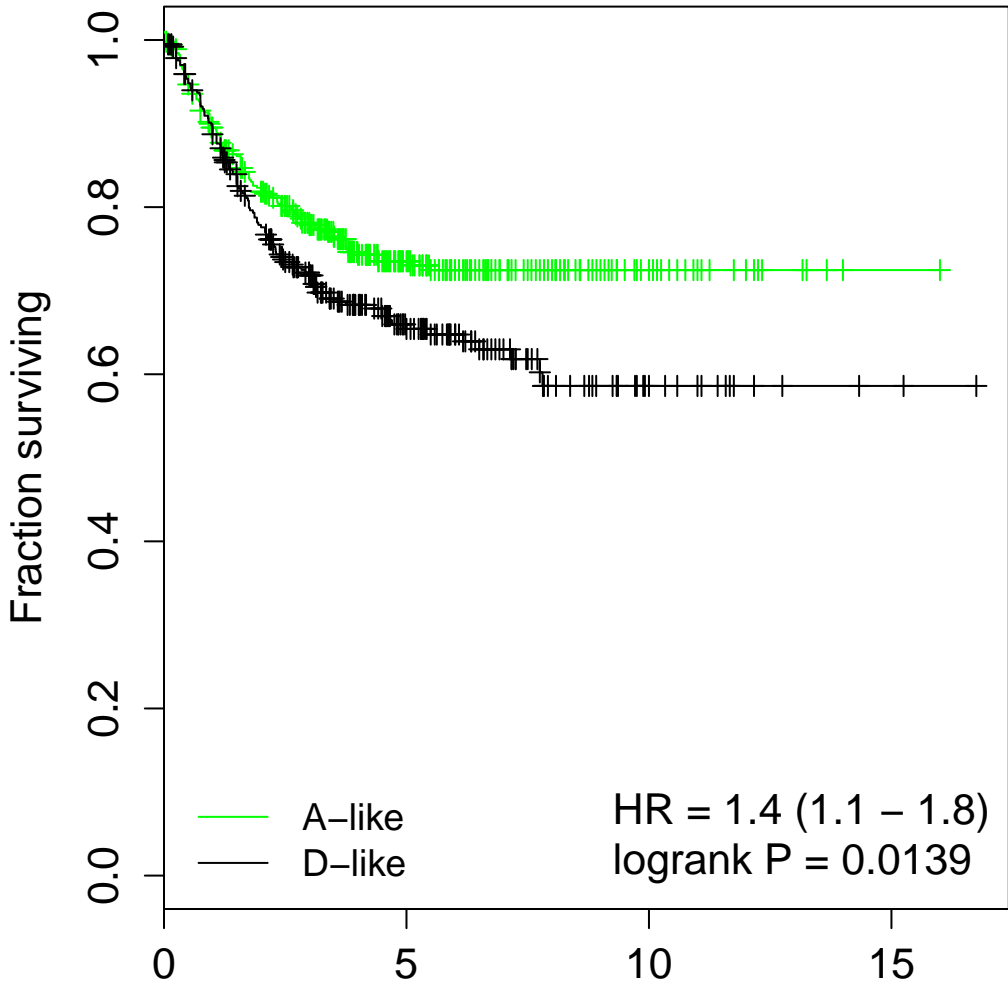

Number at risk

|        | 0   | 5   | 10 | 15 |
|--------|-----|-----|----|----|
| A-like | 461 | 156 | 22 | 1  |
| D-like | 376 | 121 | 17 | 3  |

# ODXcolon

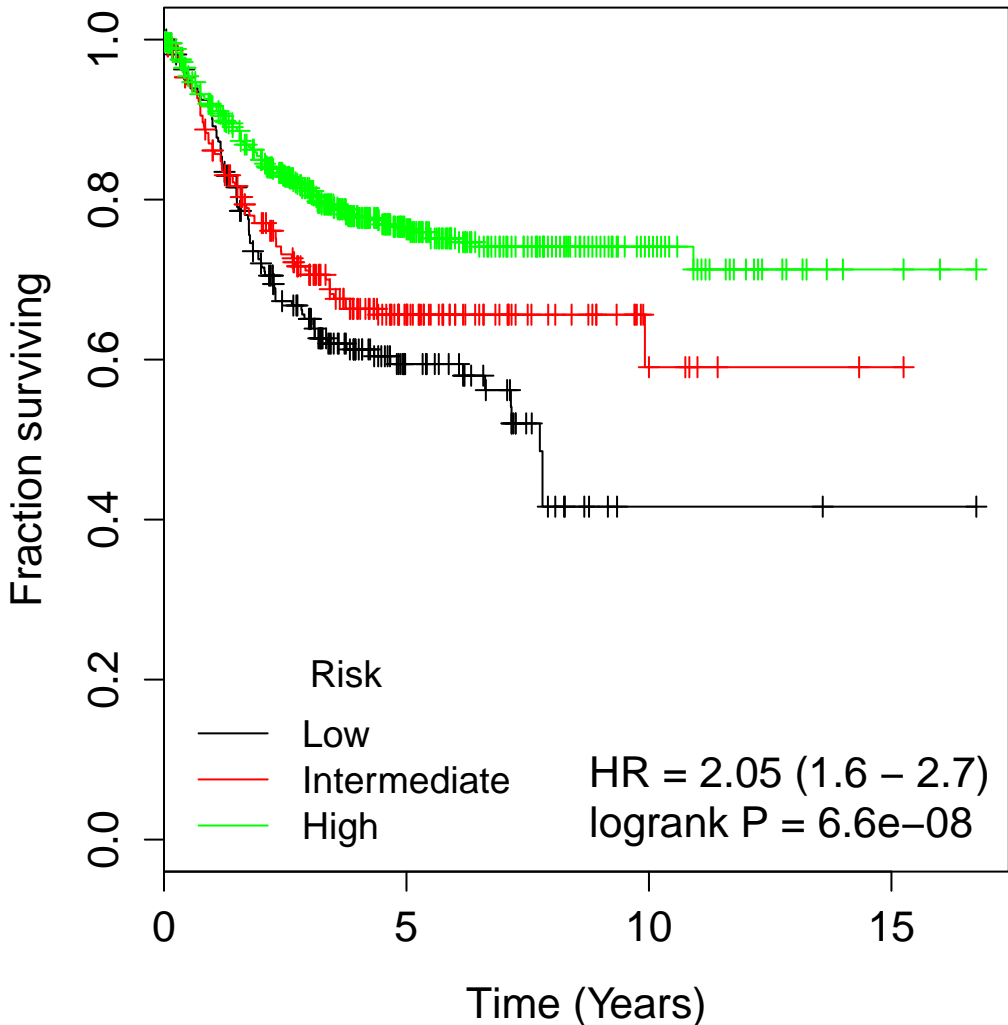

|              | Number at risk |     |    |    |
|--------------|----------------|-----|----|----|
|              | 0              | 5   | 10 | 15 |
| Low          | 219            | 49  | 2  | 1  |
| Intermediate | 238            | 72  | 9  | 1  |
| High         | 693            | 235 | 36 | 3  |



# Oncodefender

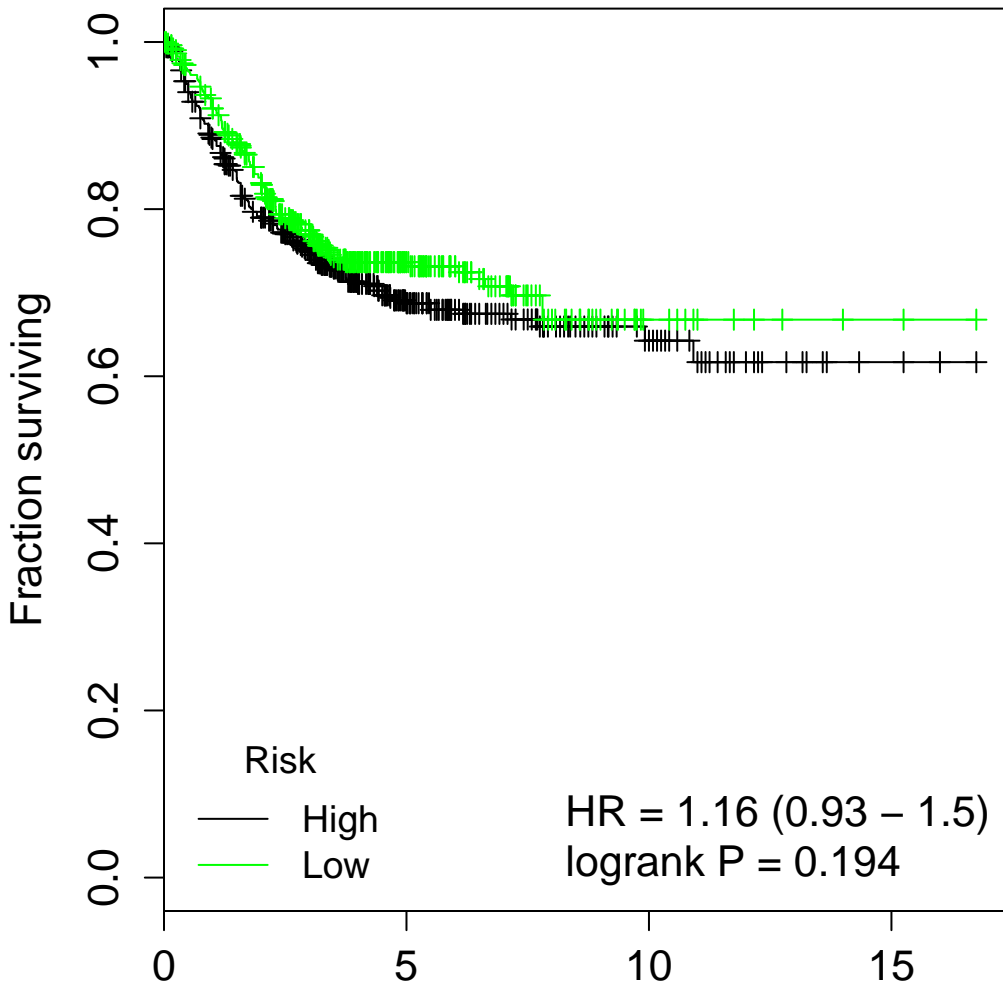

Number at risk

|      |     |     |    |   |
|------|-----|-----|----|---|
| High | 631 | 204 | 36 | 3 |
| Low  | 519 | 152 | 11 | 2 |

# Popovici

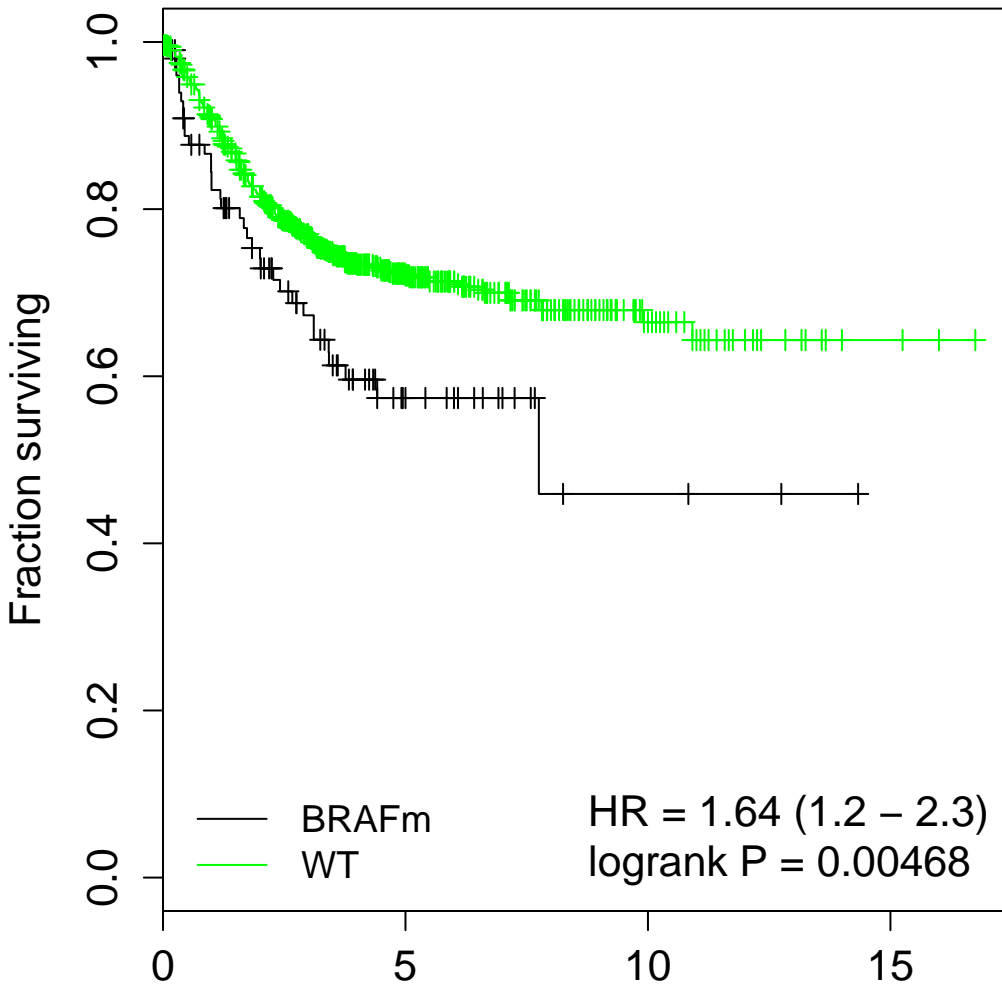

Number at risk

|       |      |     |    |   |
|-------|------|-----|----|---|
| BRAFm | 103  | 21  | 3  | 0 |
| WT    | 1047 | 335 | 44 | 5 |

# Schetter

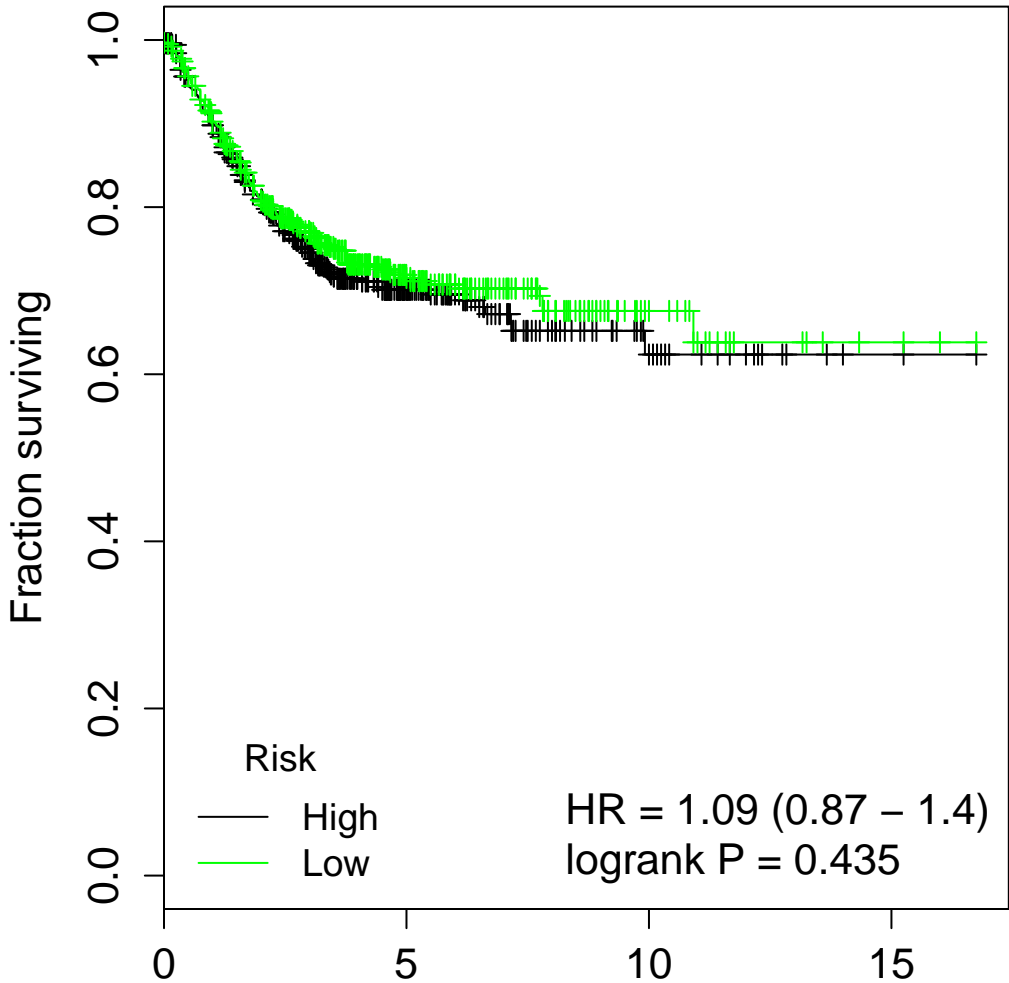

Number at risk

|      | 0   | 5   | 10 | 15 |
|------|-----|-----|----|----|
| High | 520 | 156 | 22 | 2  |
| Low  | 630 | 200 | 25 | 3  |

# TCA19

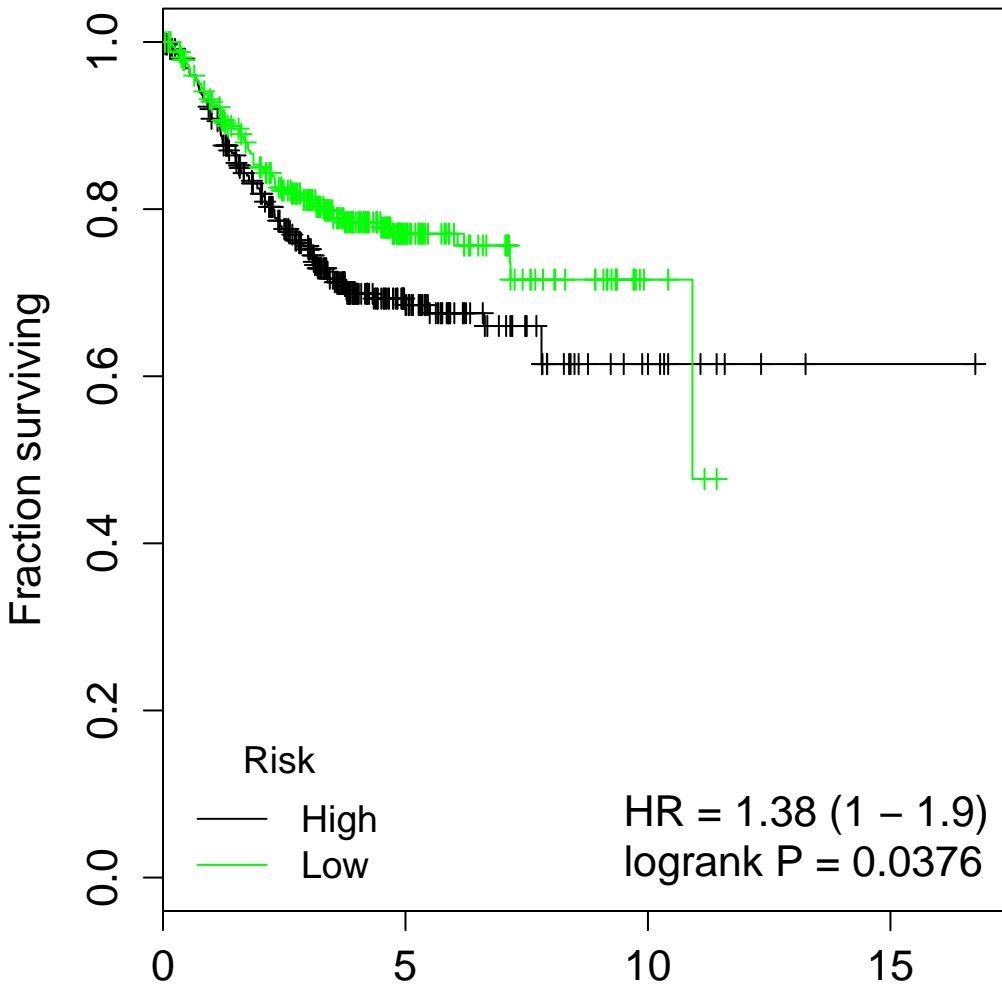

Number at risk

|      |     |    |    |   |
|------|-----|----|----|---|
| High | 358 | 90 | 10 | 1 |
| Low  | 331 | 82 | 4  | 0 |

# V7RHS

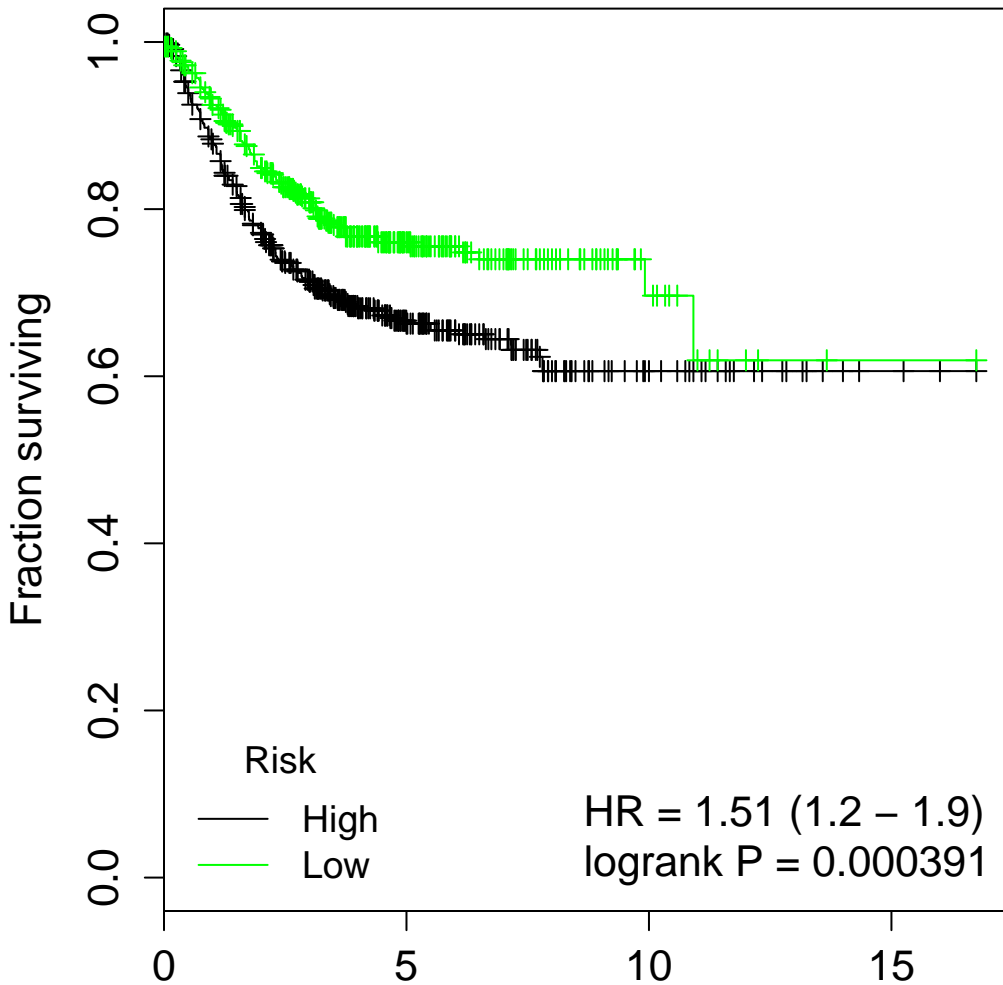

Number at risk

|      |     |     |    |   |
|------|-----|-----|----|---|
| High | 602 | 190 | 31 | 4 |
| Low  | 548 | 166 | 16 | 1 |

# Watanabe-CIN

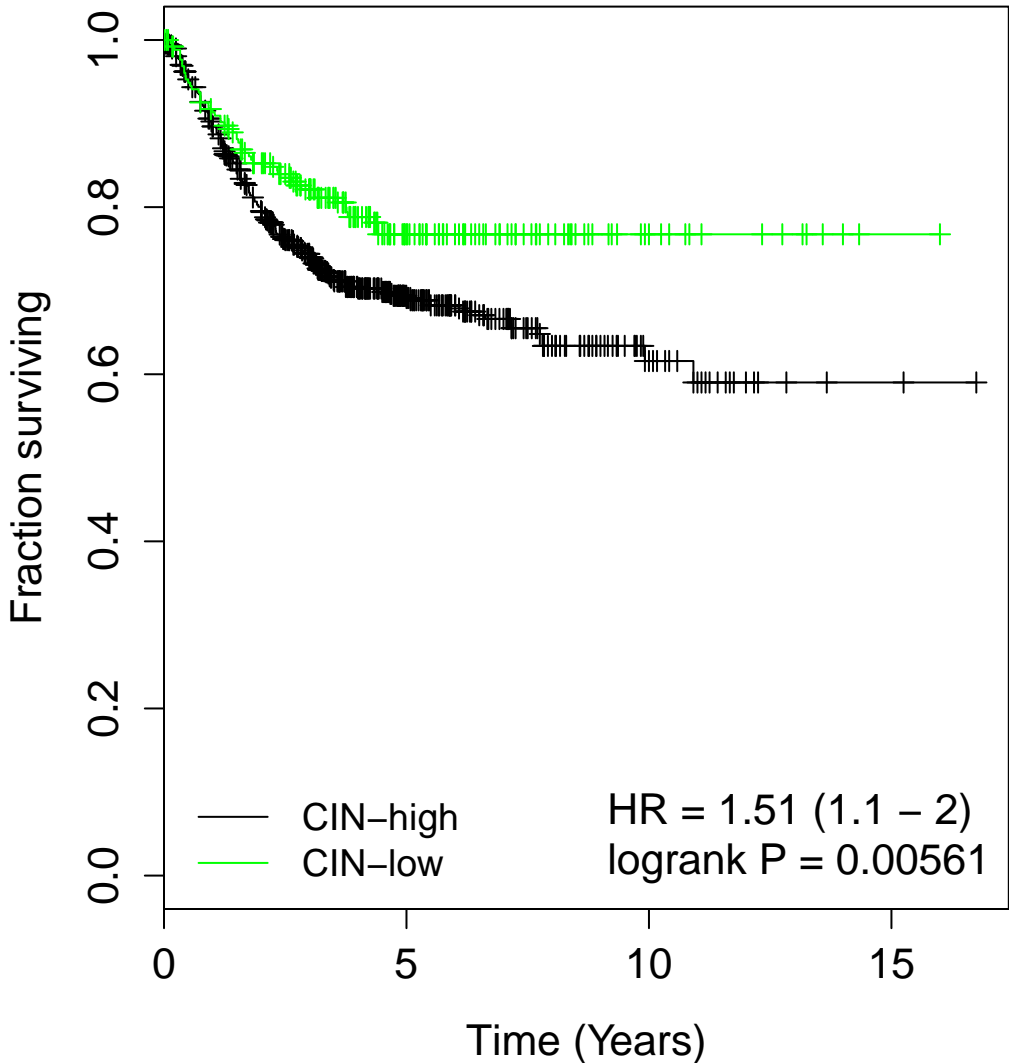

|          | Number at risk |     |    |   |
|----------|----------------|-----|----|---|
| CIN-high | 889            | 266 | 33 | 4 |
| CIN-low  | 261            | 90  | 14 | 1 |

# Yuen3

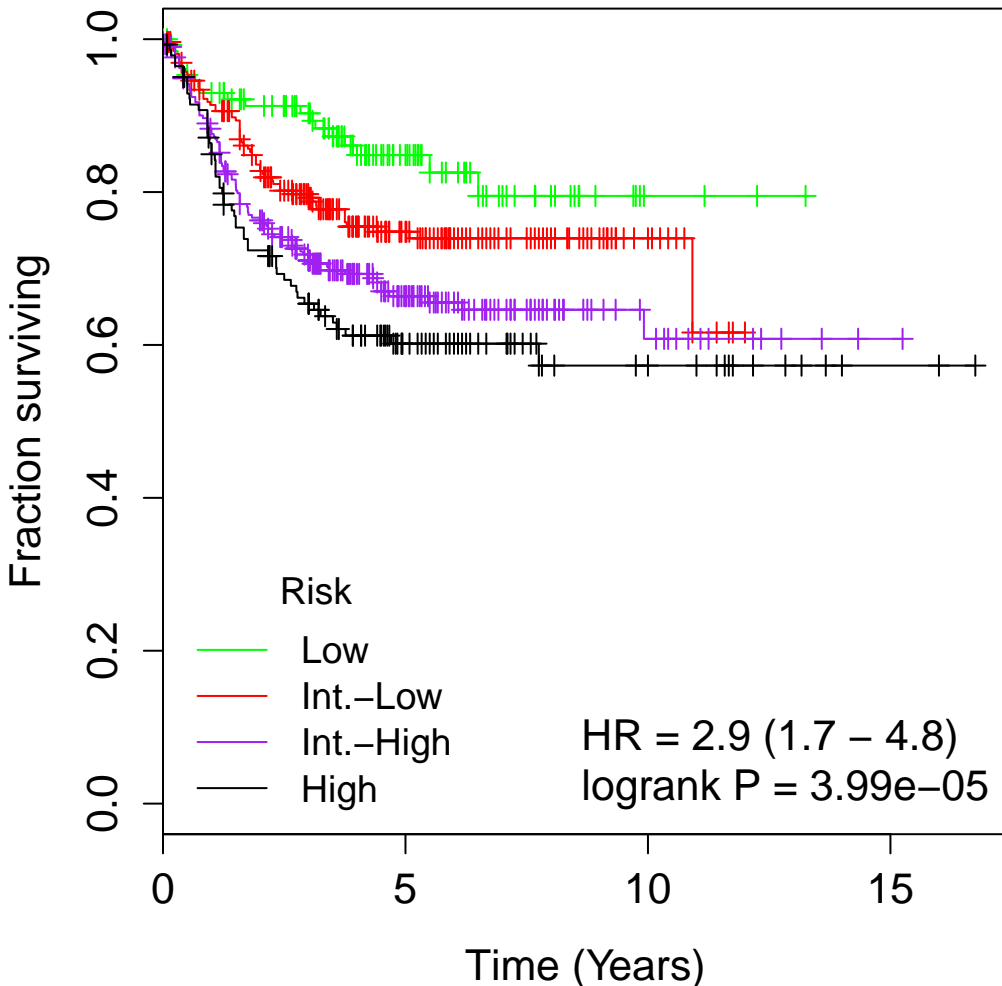

|           | Number at risk |    |    |    |
|-----------|----------------|----|----|----|
|           | 0              | 5  | 10 | 15 |
| Low       | 132            | 47 | 3  | 0  |
| Int.-Low  | 265            | 94 | 13 | 0  |
| Int.-High | 297            | 97 | 16 | 2  |
| High      | 143            | 50 | 15 | 3  |

**Supplementary Figure 2.** Forest plot for all classifiers in all samples.

| <b>Method</b>    | <b>HR</b> | <b>p-value</b> | <b>classified</b> | <b>available</b> | <b>%classified</b> |
|------------------|-----------|----------------|-------------------|------------------|--------------------|
| Budinska         | 1.97      | 8.88e-03       | 313               | 1376             | 23                 |
| CCHS             | 1.22      | 6.84e-02       | 1376              | 1376             | 100                |
| Chang95          | 2.45      | 1.00e-11       | 910               | 1376             | 66                 |
| CIN25            | 1.81      | 1.34e-08       | 1376              | 1376             | 100                |
| CMS              | 2.20      | 1.06e-08       | 748               | 1376             | 54                 |
| ColoGuideEx      | 1.65      | 1.55e-04       | 1376              | 1376             | 100                |
| ColoGuidePro     | 1.37      | 2.09e-02       | 1376              | 1376             | 100                |
| CRCassigner-786  | 1.60      | 8.20e-03       | 440               | 1376             | 32                 |
| DeSousa          | 2.00      | 7.25e-11       | 1111              | 1376             | 81                 |
| Marisa           | 3.20      | 1.22e-09       | 329               | 1376             | 24                 |
| MDA114           | 1.62      | 5.21e-06       | 1376              | 1376             | 100                |
| Merlos-EphB2-ISC | 1.34      | 1.38e-01       | 412               | 1376             | 30                 |
| Merlos-Lgr5-ISC  | 1.40      | 4.11e-02       | 554               | 1376             | 40                 |
| Meta163          | 1.80      | 1.29e-07       | 1376              | 1376             | 100                |
| ODXcolon         | 2.28      | 4.27e-12       | 1110              | 1376             | 81                 |
| Oncodefender     | 1.30      | 1.40e-02       | 1376              | 1376             | 100                |
| Popovici         | 1.74      | 6.44e-04       | 1376              | 1376             | 100                |
| Schetter         | 1.20      | 1.36e-01       | 1376              | 1376             | 100                |
| TCA19            | 1.34      | 4.65e-03       | 1376              | 1376             | 100                |
| V7RHS            | 1.41      | 1.07e-03       | 1376              | 1376             | 100                |
| Watanabe-CIN     | 1.76      | 4.44e-05       | 1376              | 1376             | 100                |
| Yuen3            | 2.70      | 5.48e-07       | 449               | 1376             | 33                 |

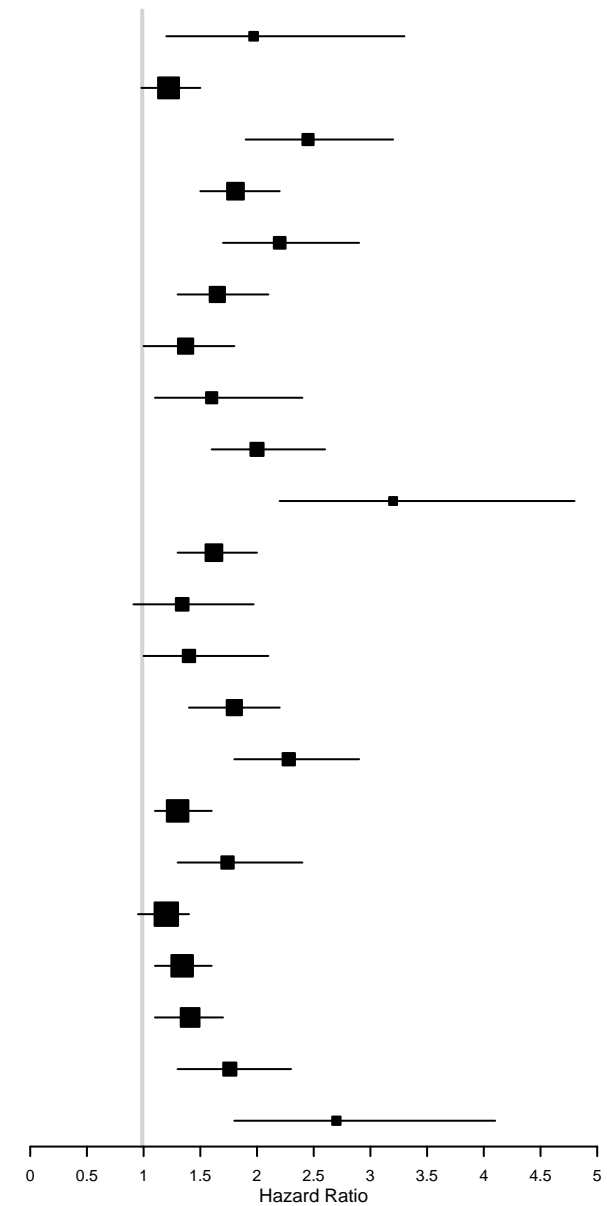



**Supplementary Figure 3.** Forest plot for all classifiers in stage II patients

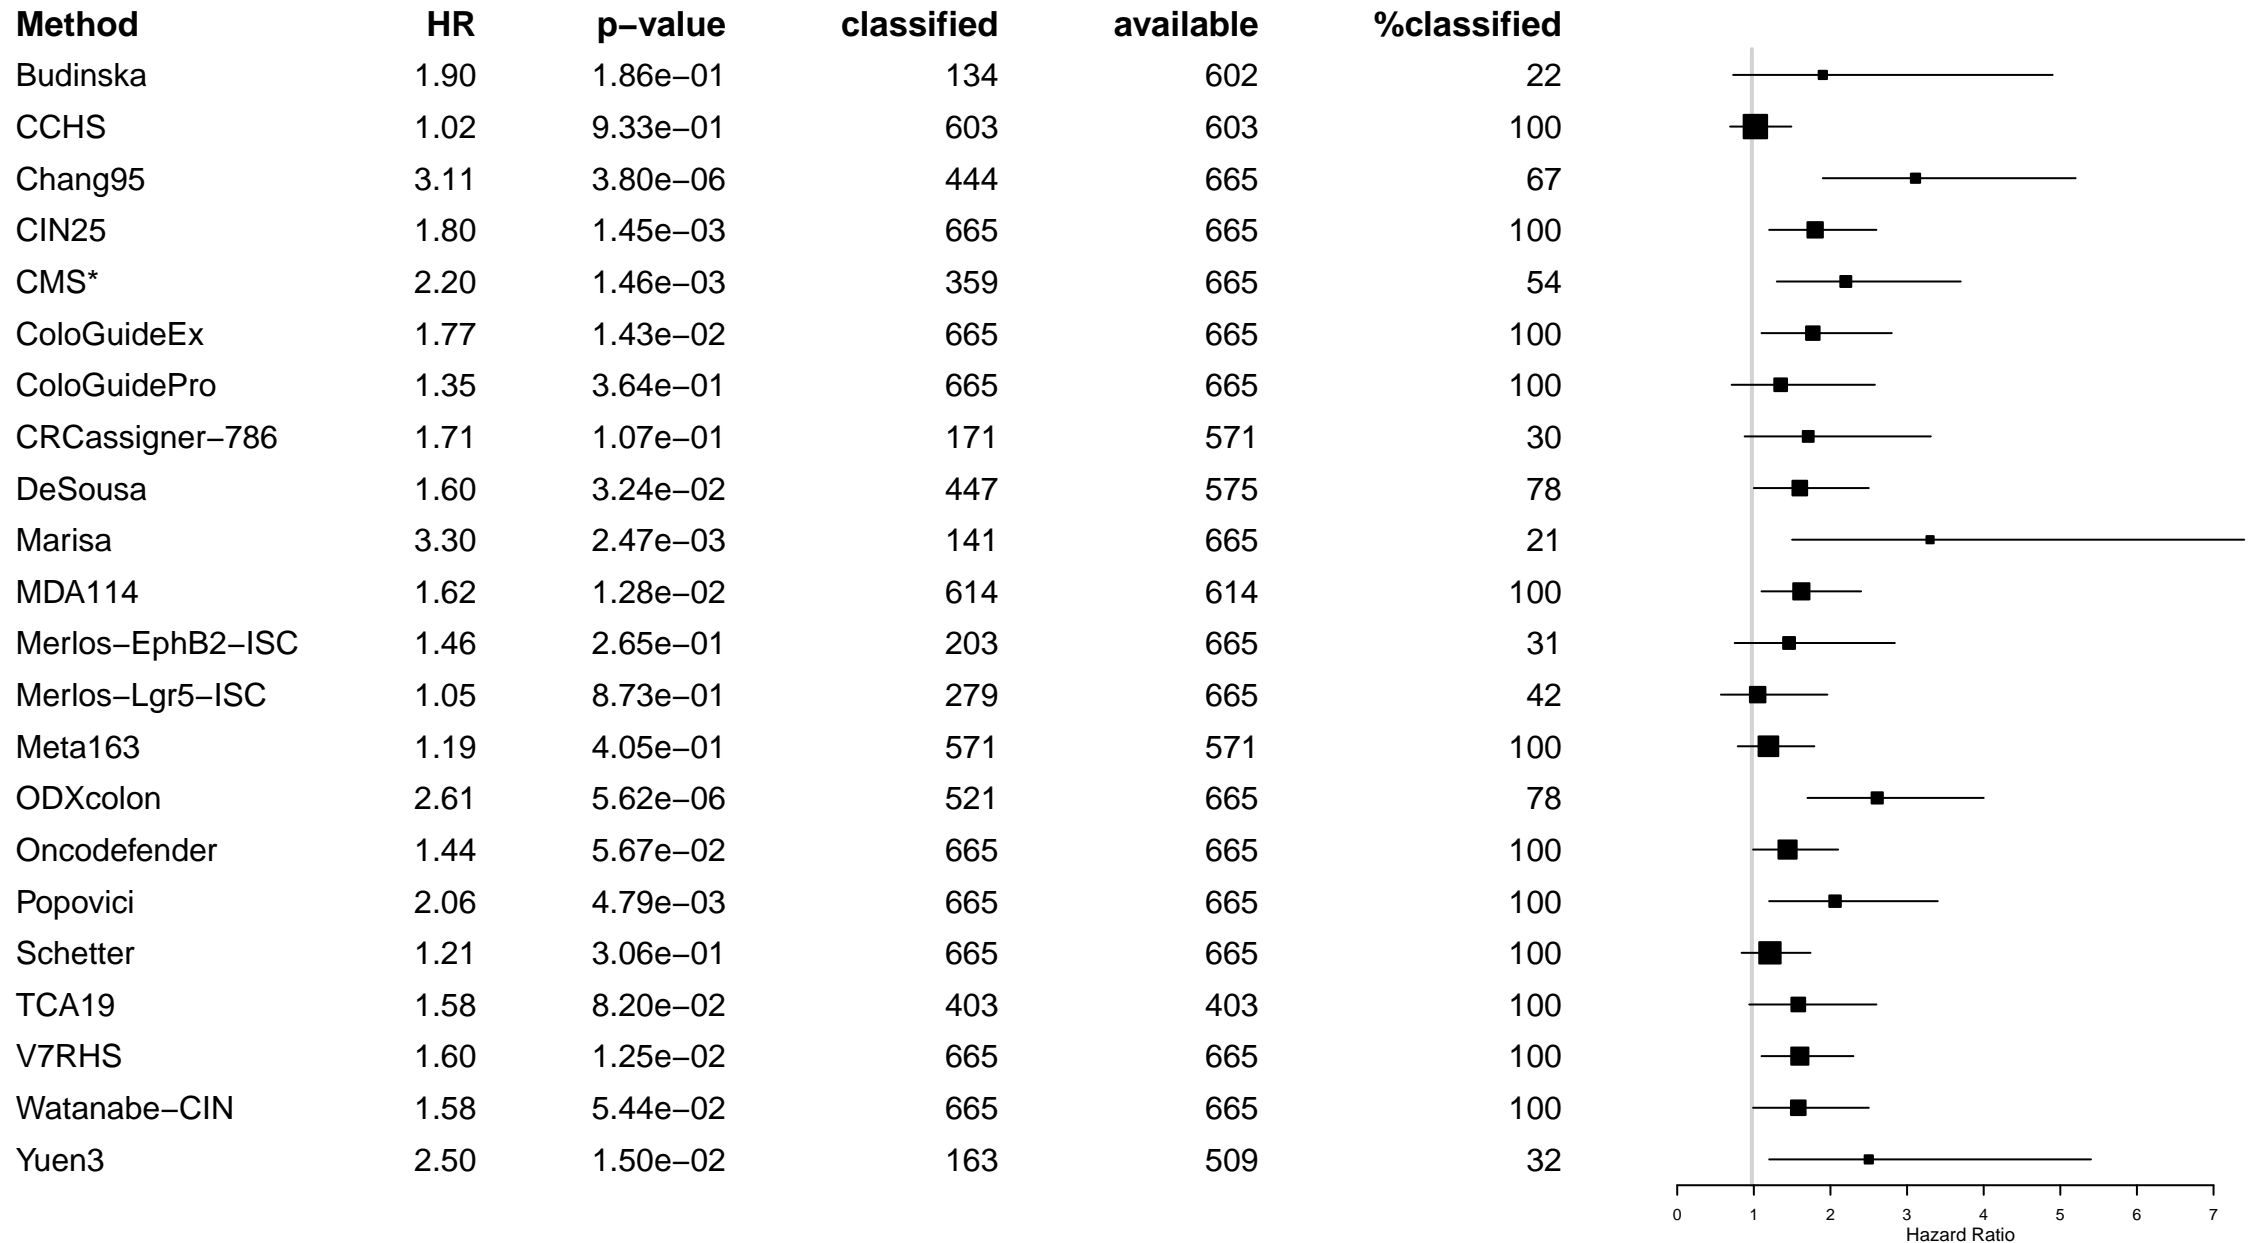

**Supplementary Figure 4.** Forest plot for all classifiers in stage III patients

| <b>Method</b>    | <b>HR</b> | <b>p-value</b> | <b>classified</b> | <b>available</b> | <b>%classified</b> |
|------------------|-----------|----------------|-------------------|------------------|--------------------|
| Budinska         | 2.22      | 0.03670        | 113               | 414              | 27                 |
| CCHS             | 1.08      | 0.66600        | 422               | 422              | 100                |
| Chang95          | 1.75      | 0.00289        | 314               | 488              | 64                 |
| CIN25            | 1.33      | 0.04990        | 488               | 488              | 100                |
| CMS*             | 1.70      | 0.00814        | 265               | 488              | 54                 |
| ColoGuideEx      | 1.45      | 0.04940        | 488               | 488              | 100                |
| ColoGuidePro     | 1.37      | 0.08100        | 488               | 488              | 100                |
| CRCAssigner-786  | 1.80      | 0.03510        | 146               | 397              | 37                 |
| DeSousa          | 1.50      | 0.00848        | 403               | 488              | 83                 |
| Marisa           | 1.73      | 0.05160        | 115               | 488              | 24                 |
| MDA114           | 1.28      | 0.11900        | 440               | 440              | 100                |
| Merlos-EphB2-ISC | 1.12      | 0.69100        | 142               | 488              | 29                 |
| Merlos-Lgr5-ISC  | 1.25      | 0.39600        | 189               | 488              | 39                 |
| Meta163          | 1.38      | 0.05750        | 397               | 397              | 100                |
| ODXcolon         | 1.52      | 0.01400        | 394               | 488              | 81                 |
| Oncodefender     | 1.05      | 0.73900        | 488               | 488              | 100                |
| Popovici         | 1.41      | 0.15700        | 488               | 488              | 100                |
| Schetter         | 1.29      | 0.07970        | 488               | 488              | 100                |
| TCA19            | 1.28      | 0.20500        | 286               | 286              | 100                |
| V7RHS            | 1.43      | 0.01510        | 488               | 488              | 100                |
| Watanabe-CIN     | 1.40      | 0.10200        | 488               | 488              | 100                |
| Yuen3            | 2.30      | 0.01960        | 113               | 331              | 34                 |

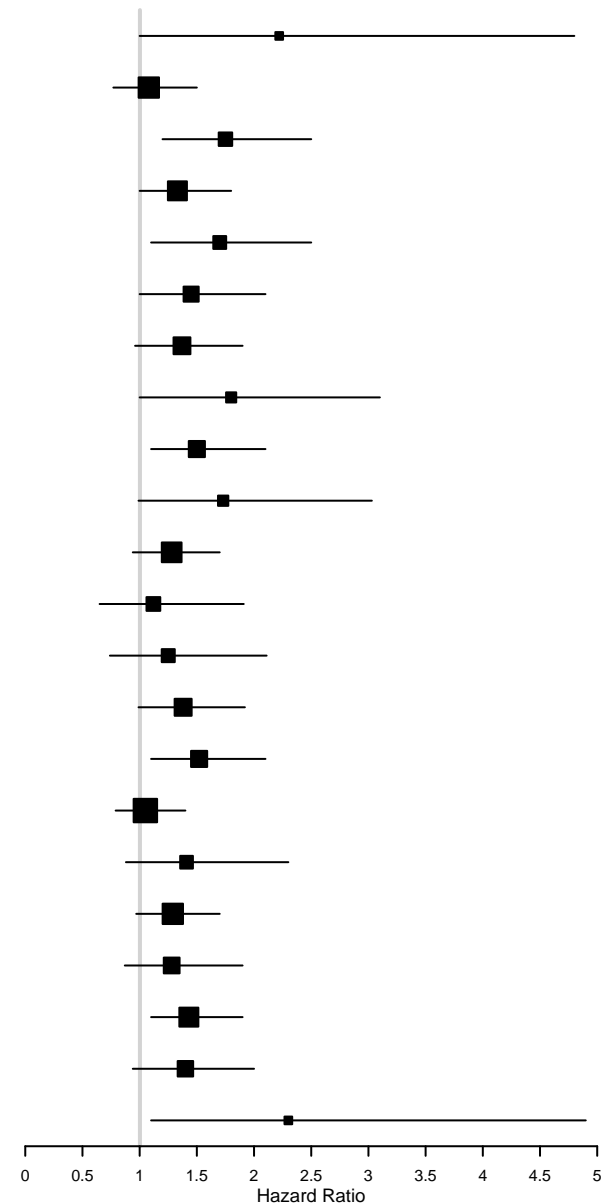

**Supplementary Figure 5.**  
**Individual Kaplan-Meier plots for each**  
**classifier in all samples.**

22 Kaplan-Meier plots

# Budinska

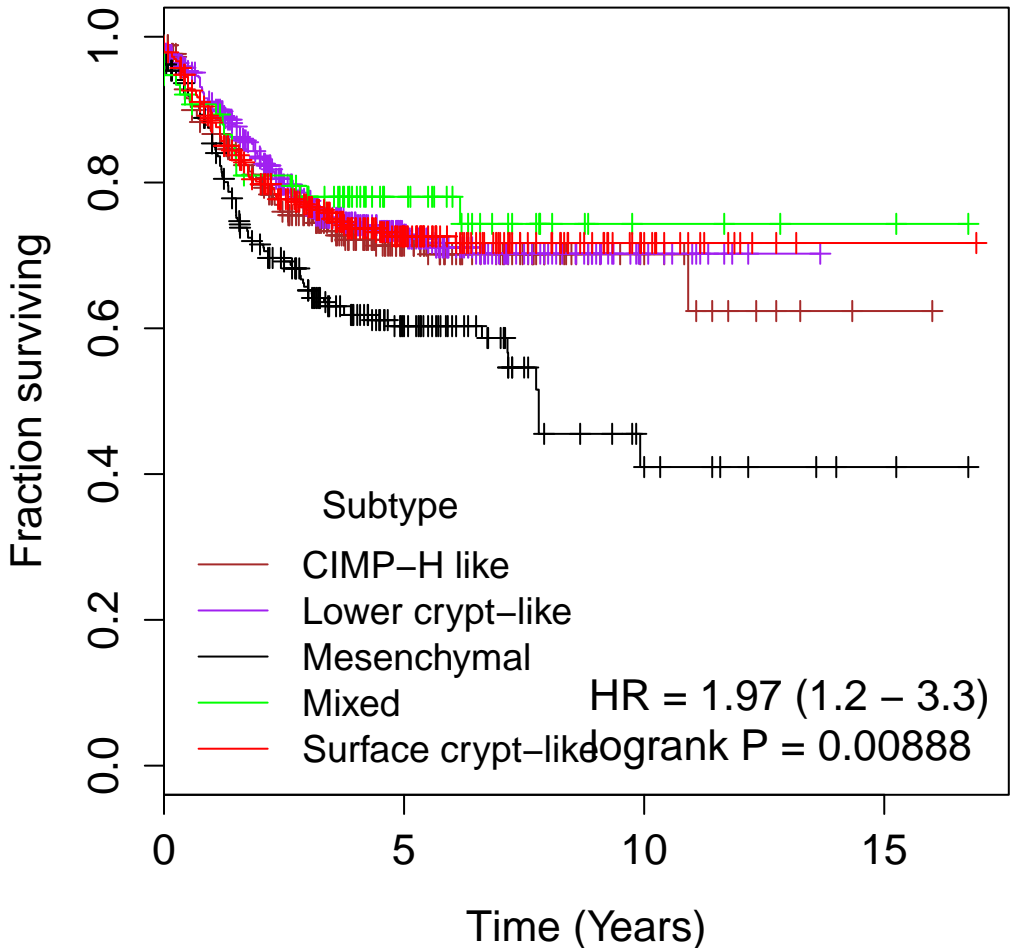

Number at risk

|                    |     |     |    |   |
|--------------------|-----|-----|----|---|
| CIMP-H like        | 257 | 73  | 12 | 1 |
| Lower crypt-like   | 475 | 144 | 14 | 0 |
| Mesenchymal        | 237 | 66  | 9  | 2 |
| Mixed              | 76  | 29  | 4  | 2 |
| Surface crypt-like | 328 | 110 | 18 | 1 |

# CCHS

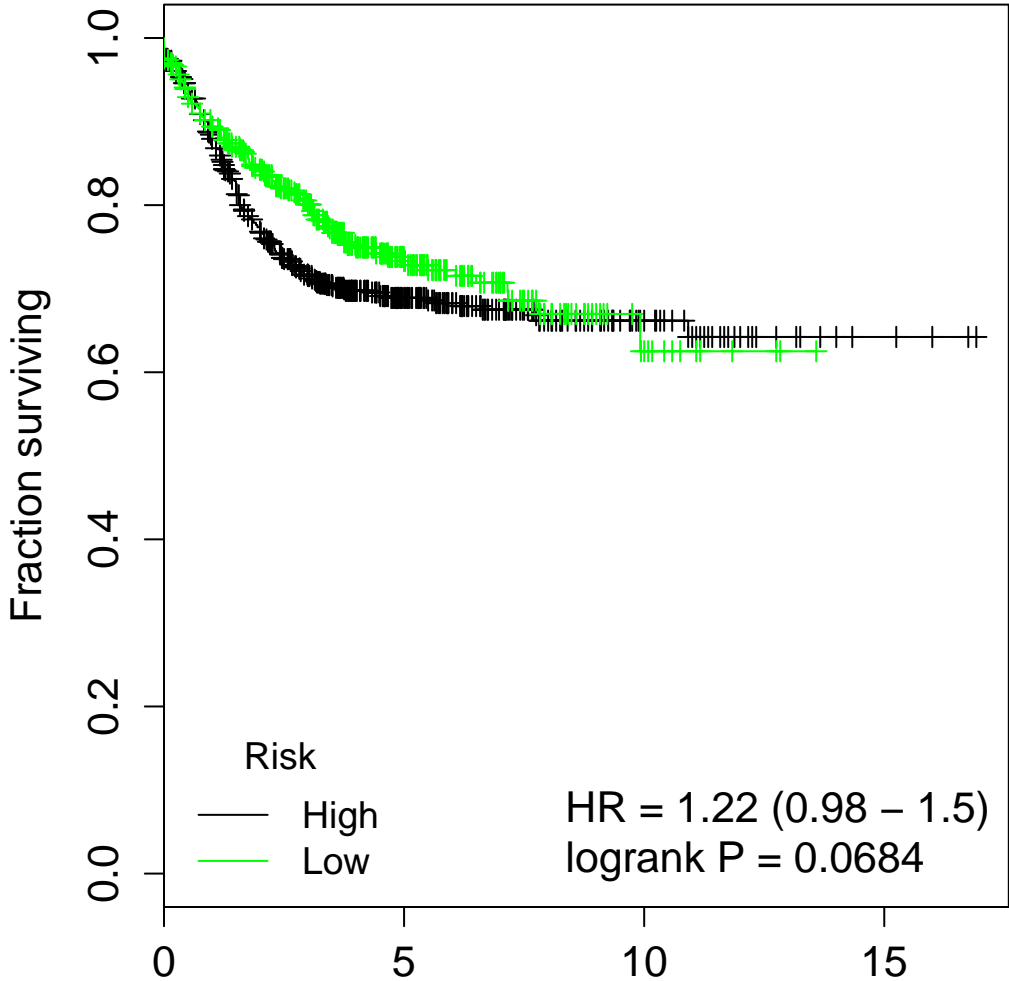

Number at risk

|      |     |     |    |   |
|------|-----|-----|----|---|
| High | 843 | 269 | 45 | 6 |
| Low  | 530 | 153 | 12 | 0 |

# Chang95

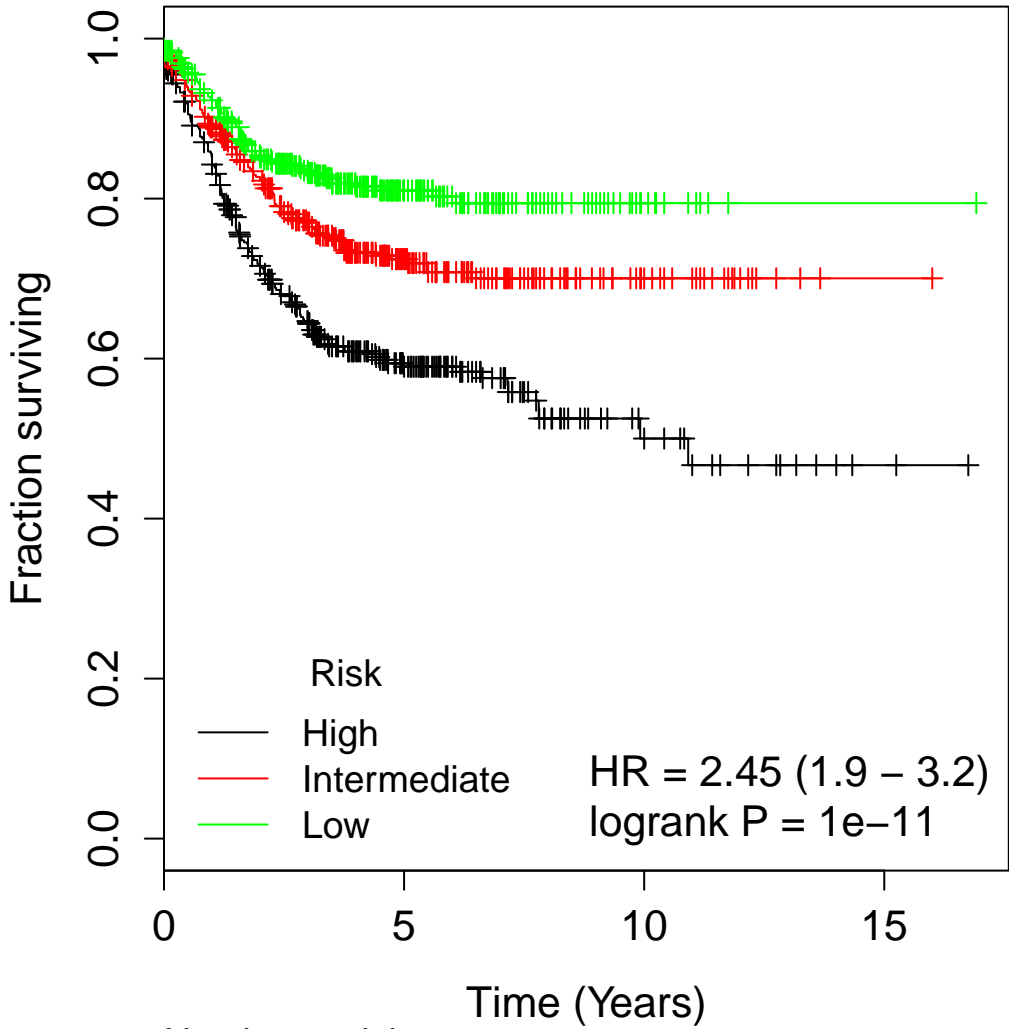

|              | Number at risk |     |    |    |
|--------------|----------------|-----|----|----|
|              | 0              | 5   | 10 | 15 |
| High         | 449            | 134 | 20 | 4  |
| Intermediate | 466            | 152 | 25 | 1  |
| Low          | 458            | 136 | 12 | 1  |

# CIN25

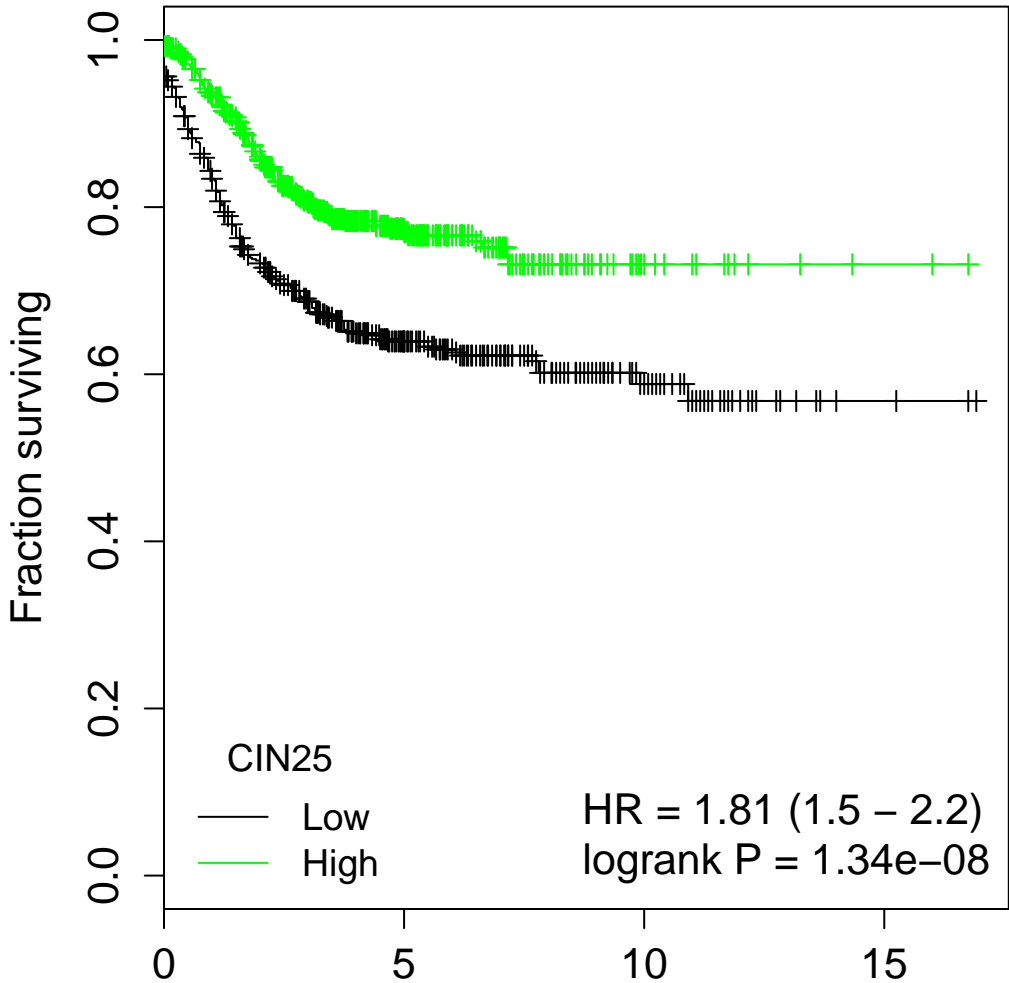

Number at risk

|      |     |     |    |   |
|------|-----|-----|----|---|
| Low  | 665 | 225 | 41 | 4 |
| High | 708 | 197 | 16 | 2 |

# CMS

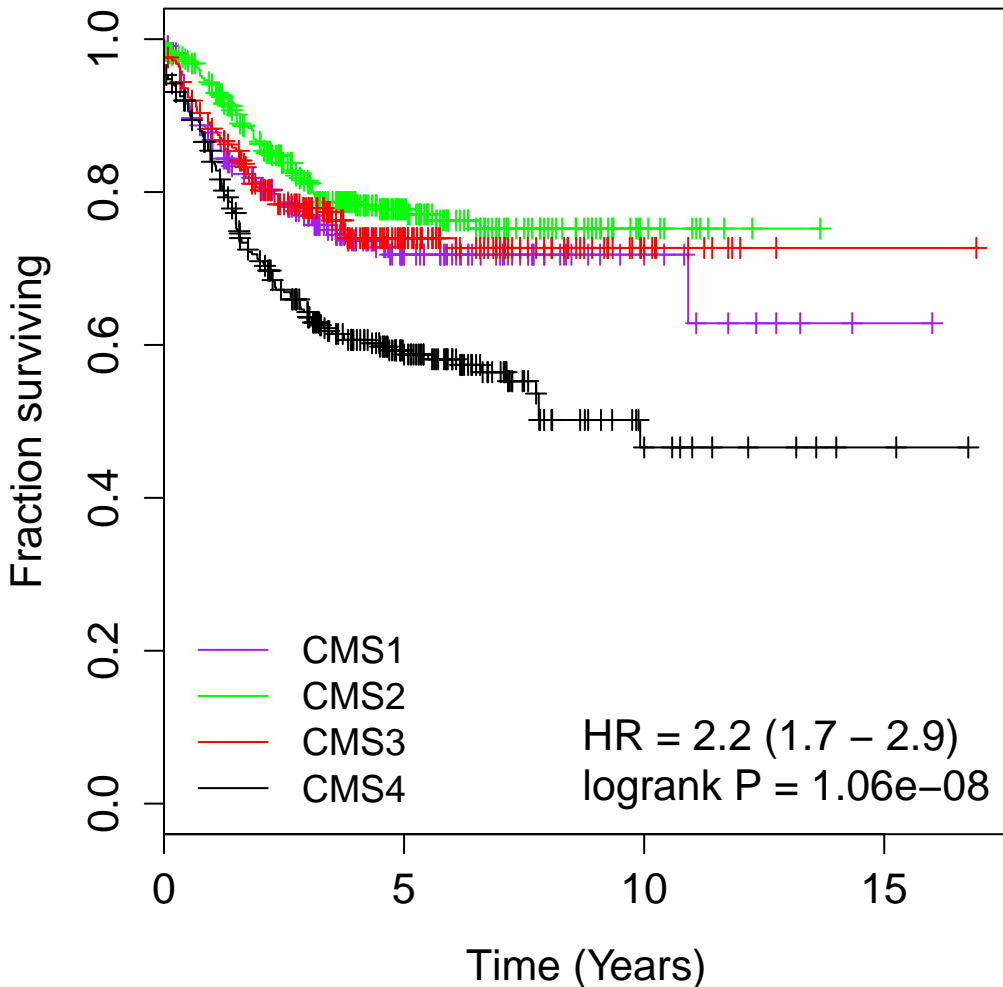

Number at risk

|      |     |     |    |   |
|------|-----|-----|----|---|
| CMS1 | 220 | 65  | 11 | 1 |
| CMS2 | 384 | 122 | 13 | 0 |
| CMS3 | 251 | 82  | 13 | 1 |
| CMS4 | 363 | 110 | 13 | 3 |



# ColoGuideEx

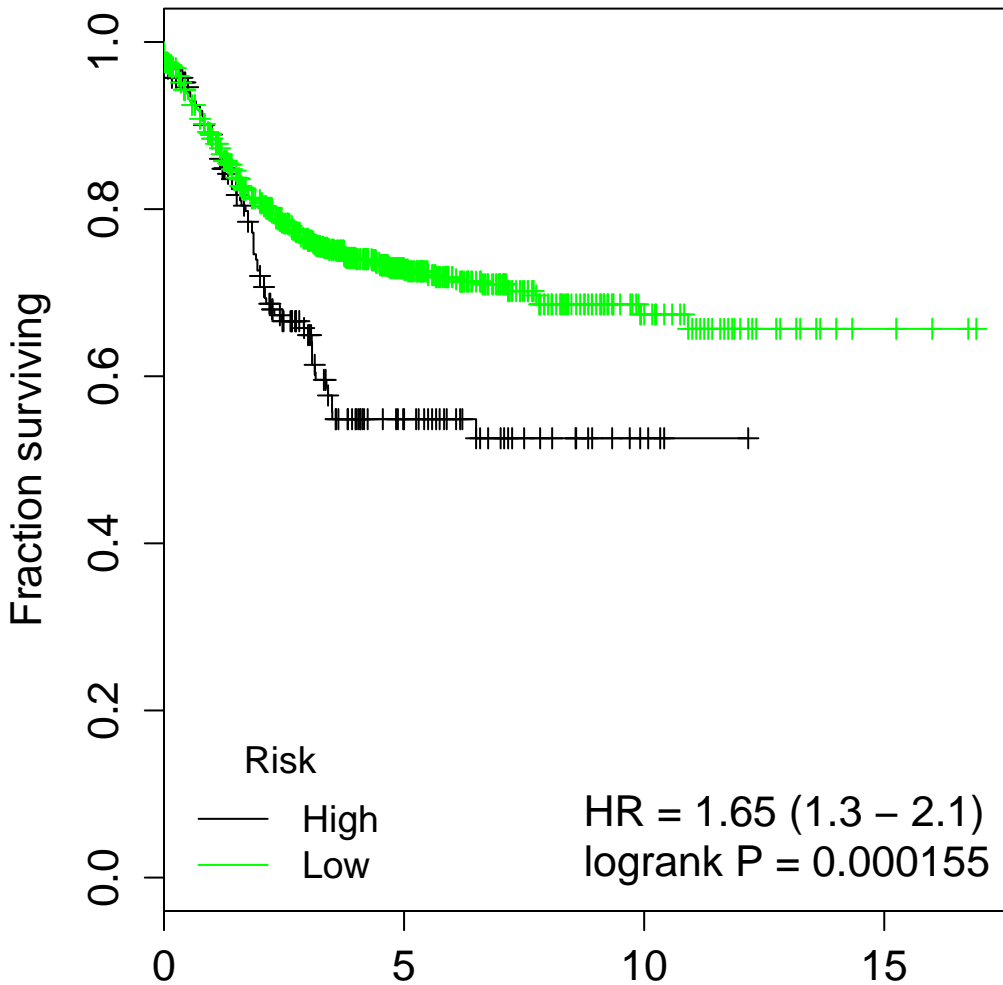

Number at risk

|      |      |     |    |   |
|------|------|-----|----|---|
| High | 188  | 39  | 5  | 0 |
| Low  | 1185 | 383 | 52 | 6 |

# ColoGuidePro

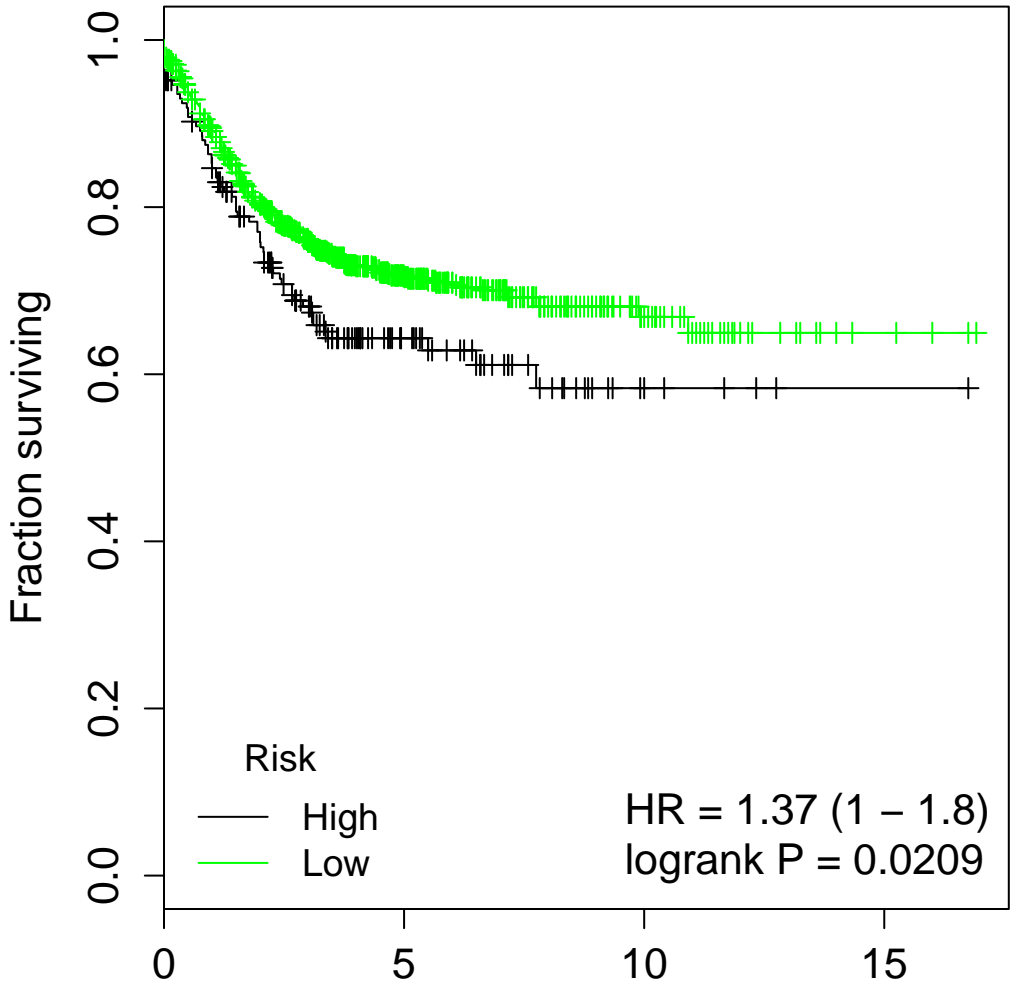

Number at risk

|      |      |     |    |   |
|------|------|-----|----|---|
| High | 187  | 50  | 7  | 1 |
| Low  | 1186 | 372 | 50 | 5 |

# CRCassigner-786

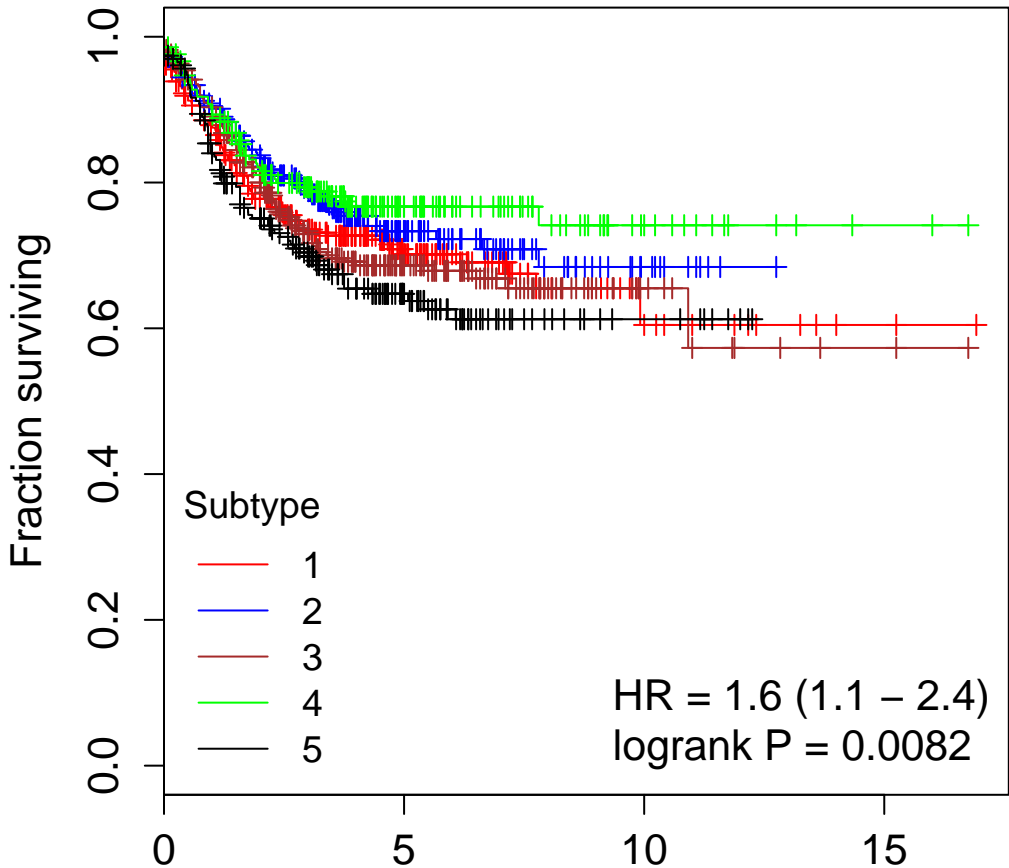

Number at risk

|   |     |     |    |   |
|---|-----|-----|----|---|
| 1 | 312 | 100 | 12 | 2 |
| 2 | 290 | 85  | 11 | 0 |
| 3 | 331 | 101 | 11 | 2 |
| 4 | 209 | 69  | 15 | 2 |
| 5 | 231 | 67  | 8  | 0 |

# DeSousa

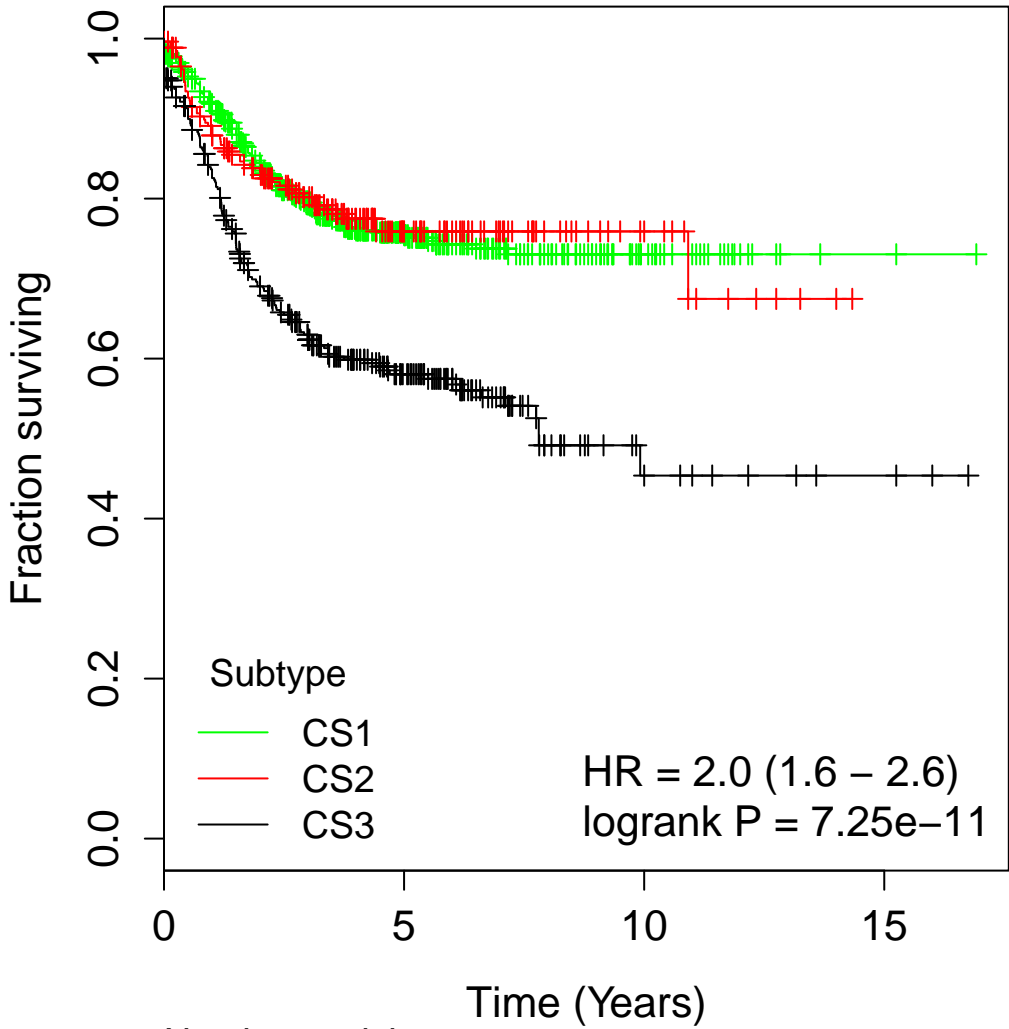

Number at risk

|     |     |     |    |   |
|-----|-----|-----|----|---|
| CS1 | 726 | 233 | 31 | 2 |
| CS2 | 264 | 75  | 14 | 0 |
| CS3 | 383 | 114 | 12 | 4 |

# Marisa

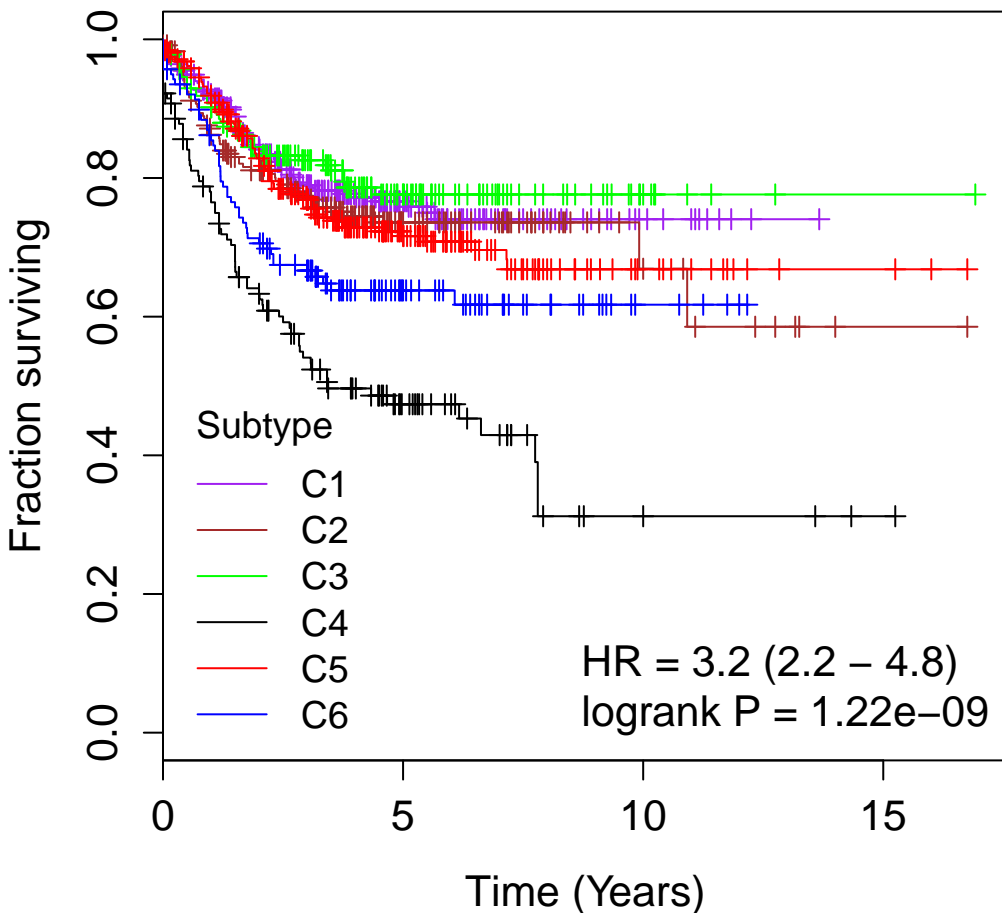

|    | Number at risk |     |    |   |
|----|----------------|-----|----|---|
| C1 | 338            | 105 | 13 | 0 |
| C2 | 232            | 64  | 10 | 1 |
| C3 | 186            | 64  | 9  | 1 |
| C4 | 141            | 33  | 4  | 1 |
| C5 | 317            | 107 | 15 | 3 |
| C6 | 139            | 39  | 5  | 0 |

# MDA114

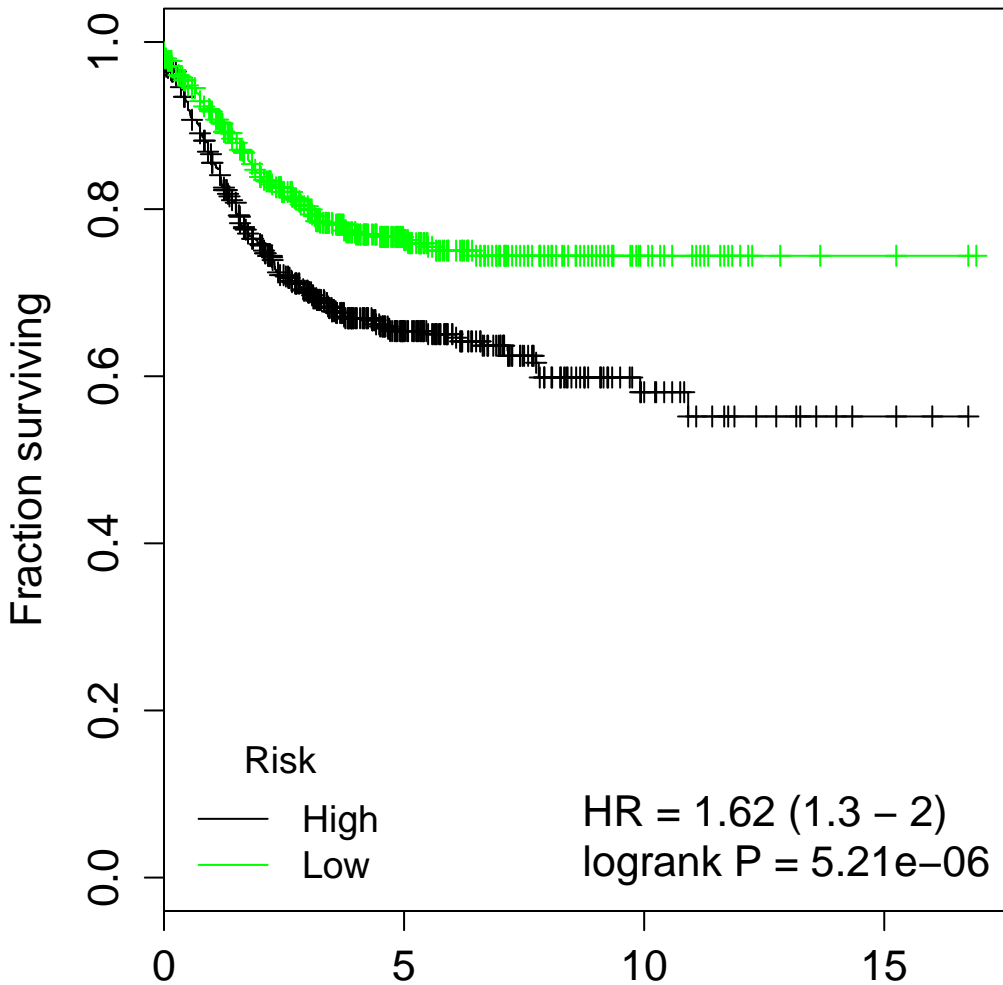

Number at risk

|      |     |     |    |   |
|------|-----|-----|----|---|
| High | 710 | 212 | 30 | 3 |
| Low  | 663 | 210 | 27 | 3 |

# Merlos-EphB2-ISC

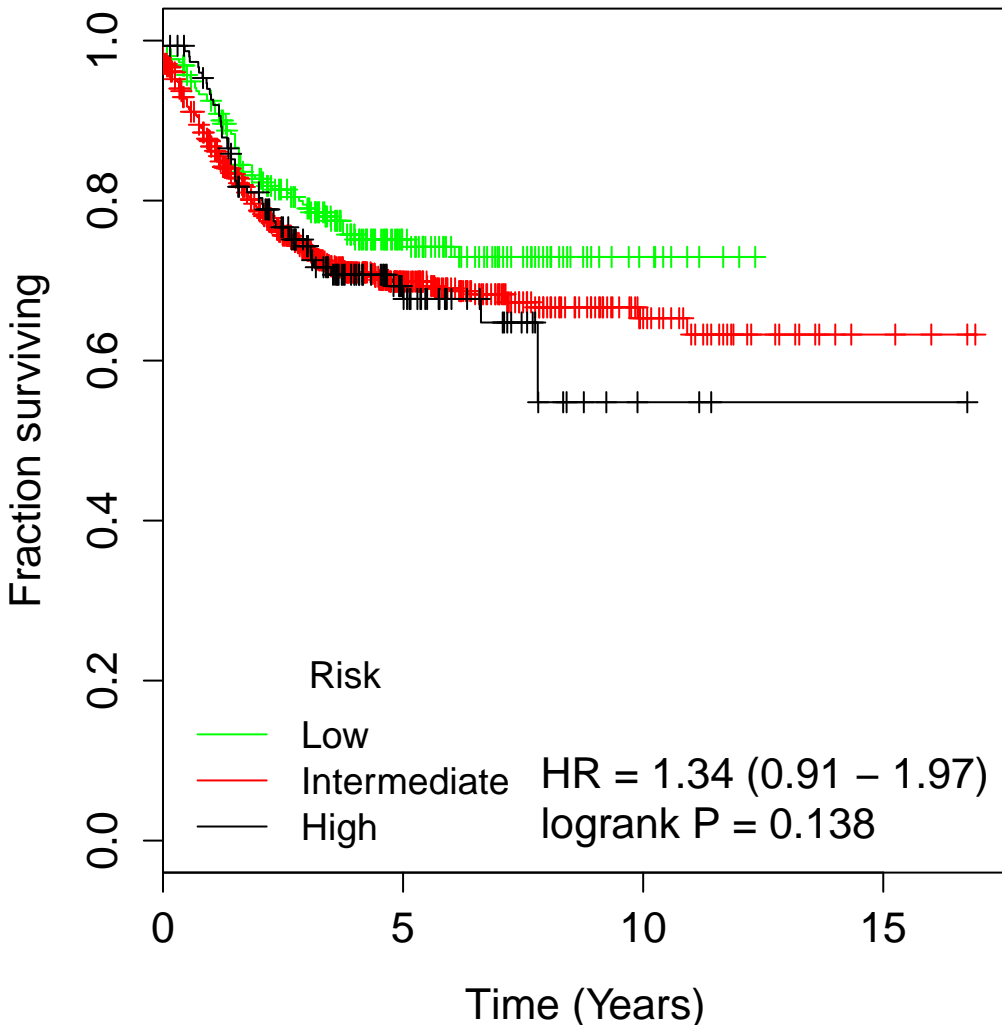

|              | Number at risk |     |    |    |
|--------------|----------------|-----|----|----|
|              | 0              | 5   | 10 | 15 |
| Low          | 258            | 83  | 10 | 0  |
| Intermediate | 962            | 296 | 44 | 5  |
| High         | 153            | 43  | 3  | 1  |

# Merlos-Lgr5-ISC

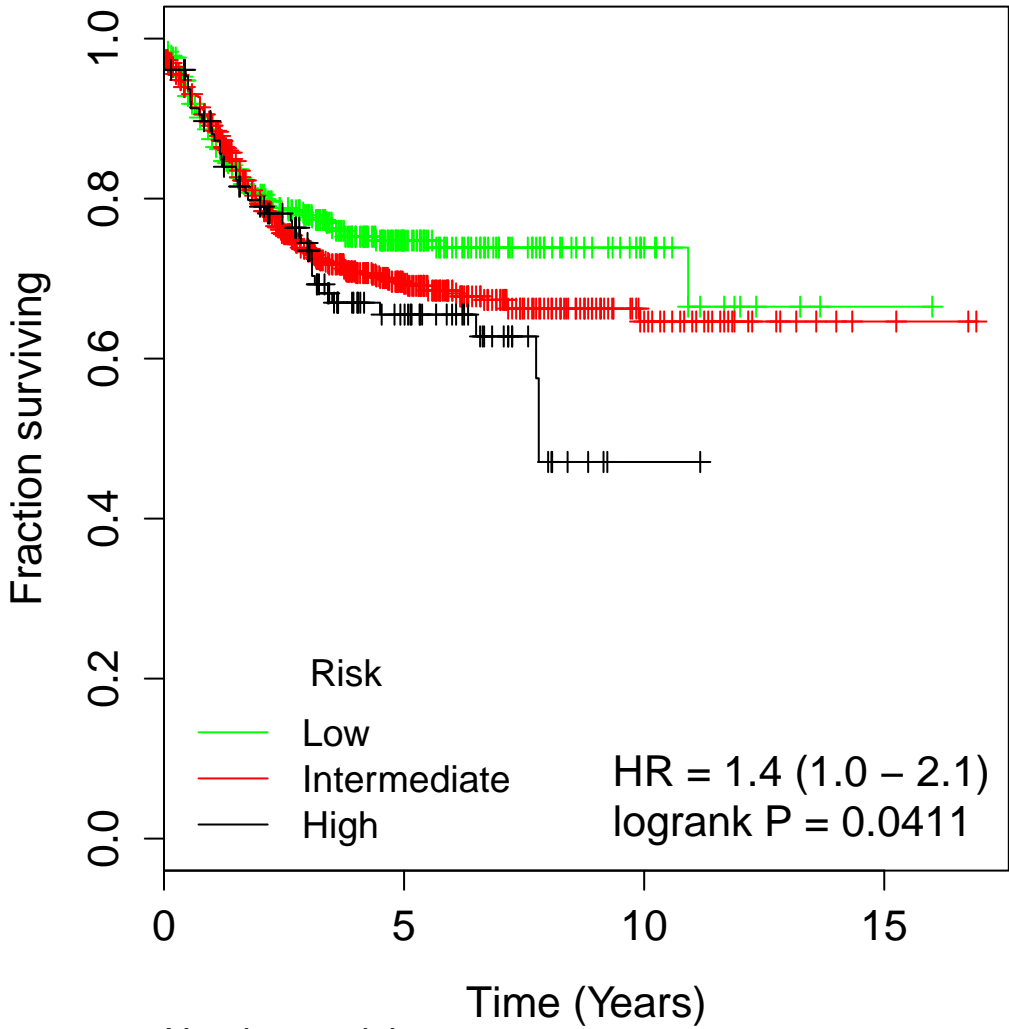

|              | Number at risk |     |    |    |
|--------------|----------------|-----|----|----|
|              | 0              | 5   | 10 | 15 |
| Low          | 425            | 111 | 18 | 1  |
| Intermediate | 820            | 270 | 38 | 5  |
| High         | 128            | 41  | 1  | 0  |



# Meta163

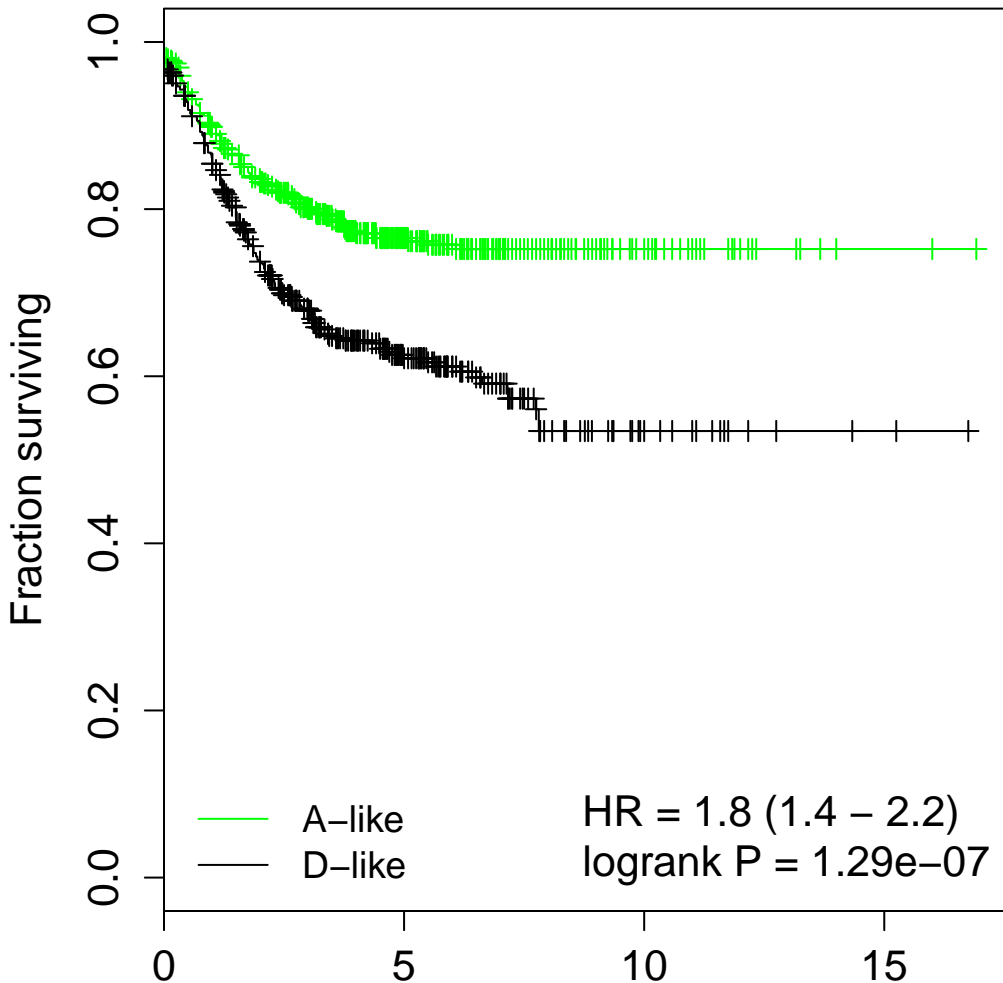

Number at risk

|        | 0   | 5   | 10 | 15 |
|--------|-----|-----|----|----|
| A-like | 625 | 210 | 30 | 2  |
| D-like | 549 | 156 | 17 | 3  |

# ODXcolon

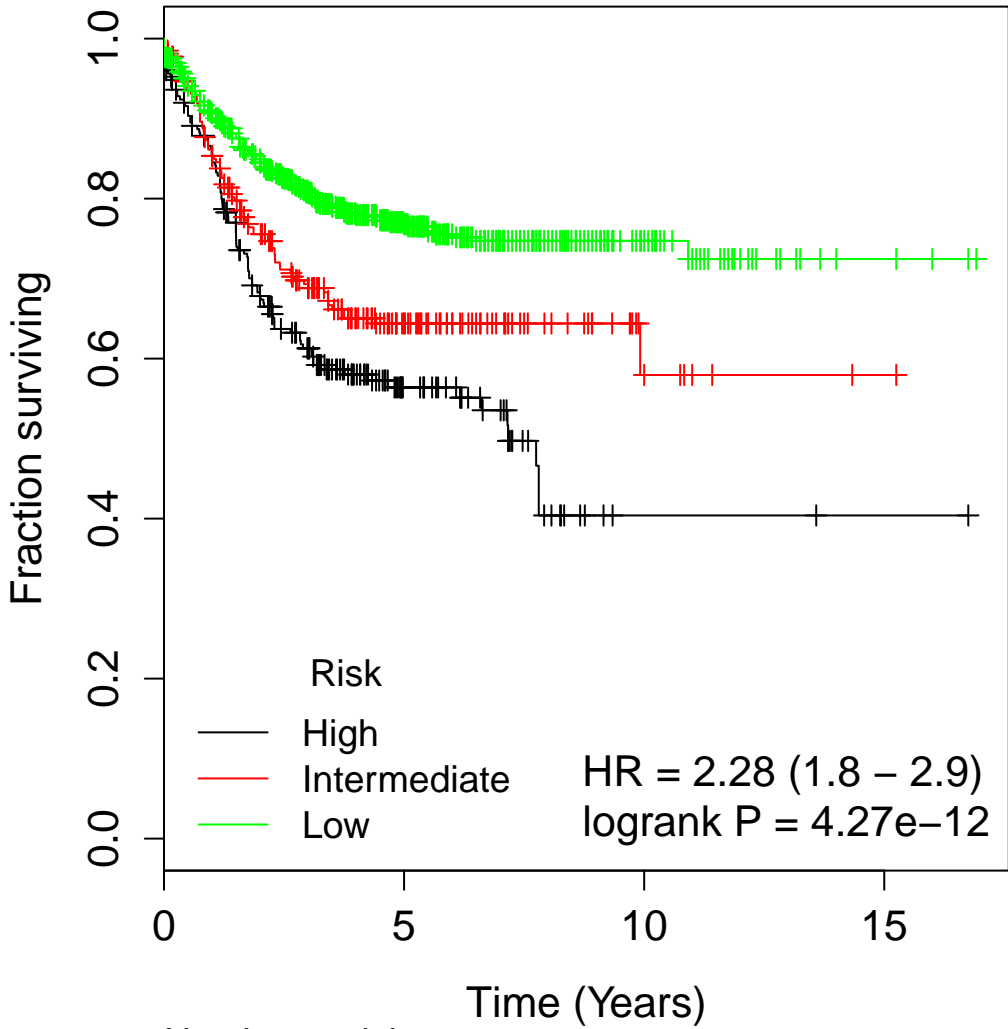

|              | Number at risk |     |    |    |
|--------------|----------------|-----|----|----|
|              | 0              | 5   | 10 | 15 |
| High         | 252            | 53  | 2  | 1  |
| Intermediate | 266            | 79  | 9  | 1  |
| Low          | 855            | 290 | 46 | 4  |

# Oncodefender

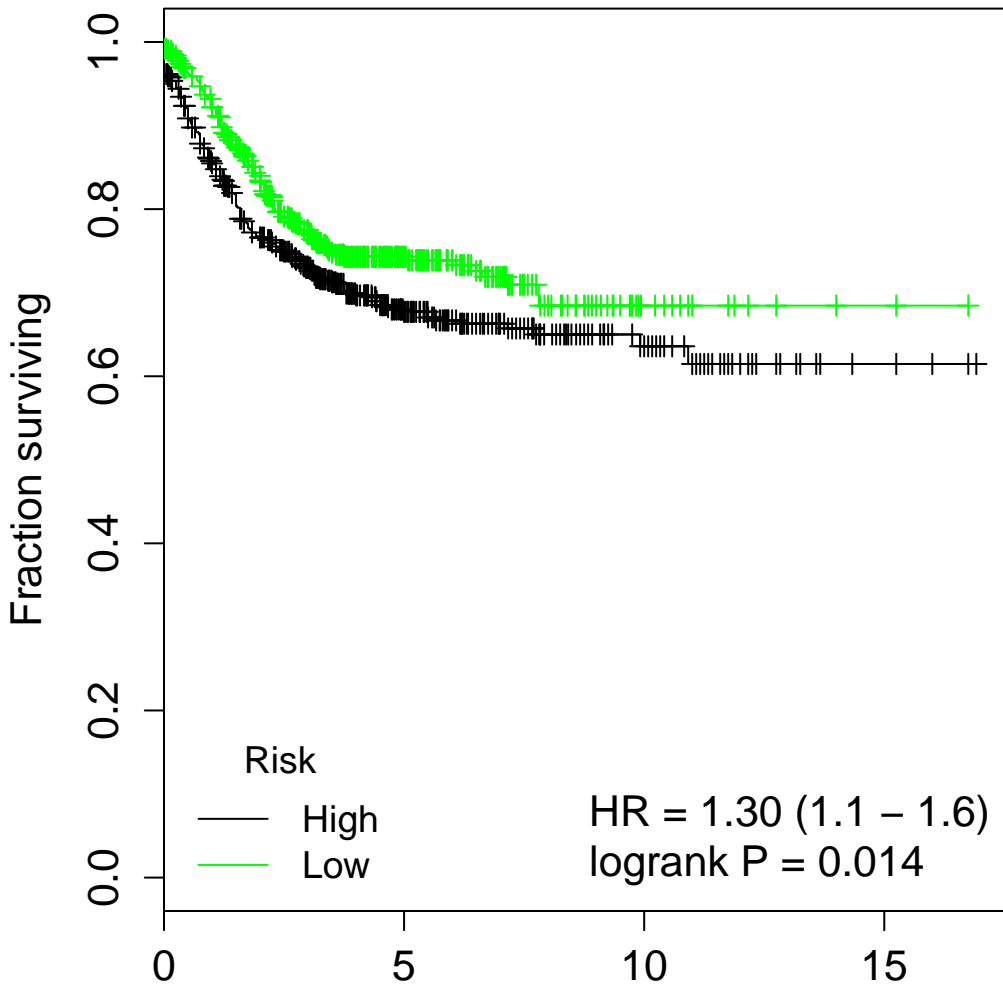

Number at risk

|      |     |     |    |   |
|------|-----|-----|----|---|
| High | 755 | 237 | 42 | 4 |
| Low  | 618 | 185 | 15 | 2 |

# Popovici

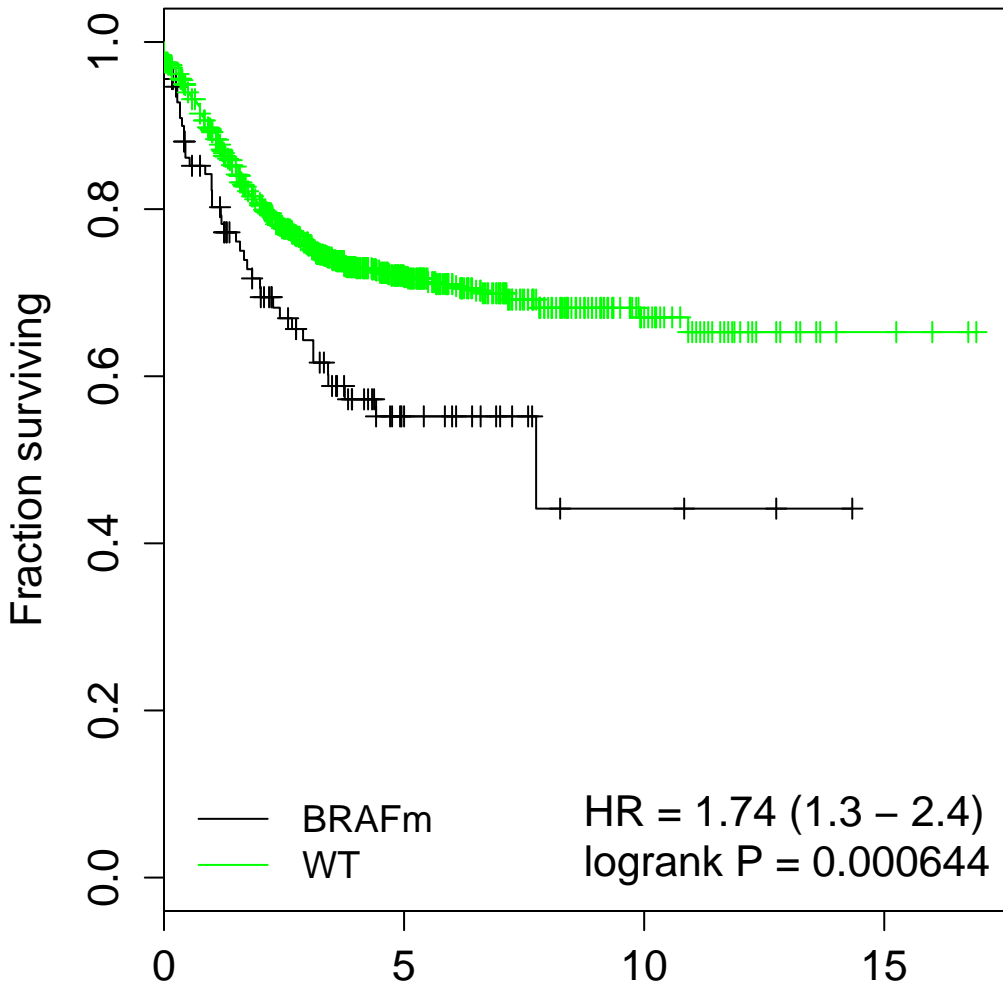

Number at risk

|       |      |     |    |   |
|-------|------|-----|----|---|
| BRAFm | 113  | 21  | 3  | 0 |
| WT    | 1260 | 401 | 54 | 6 |

# Schetter

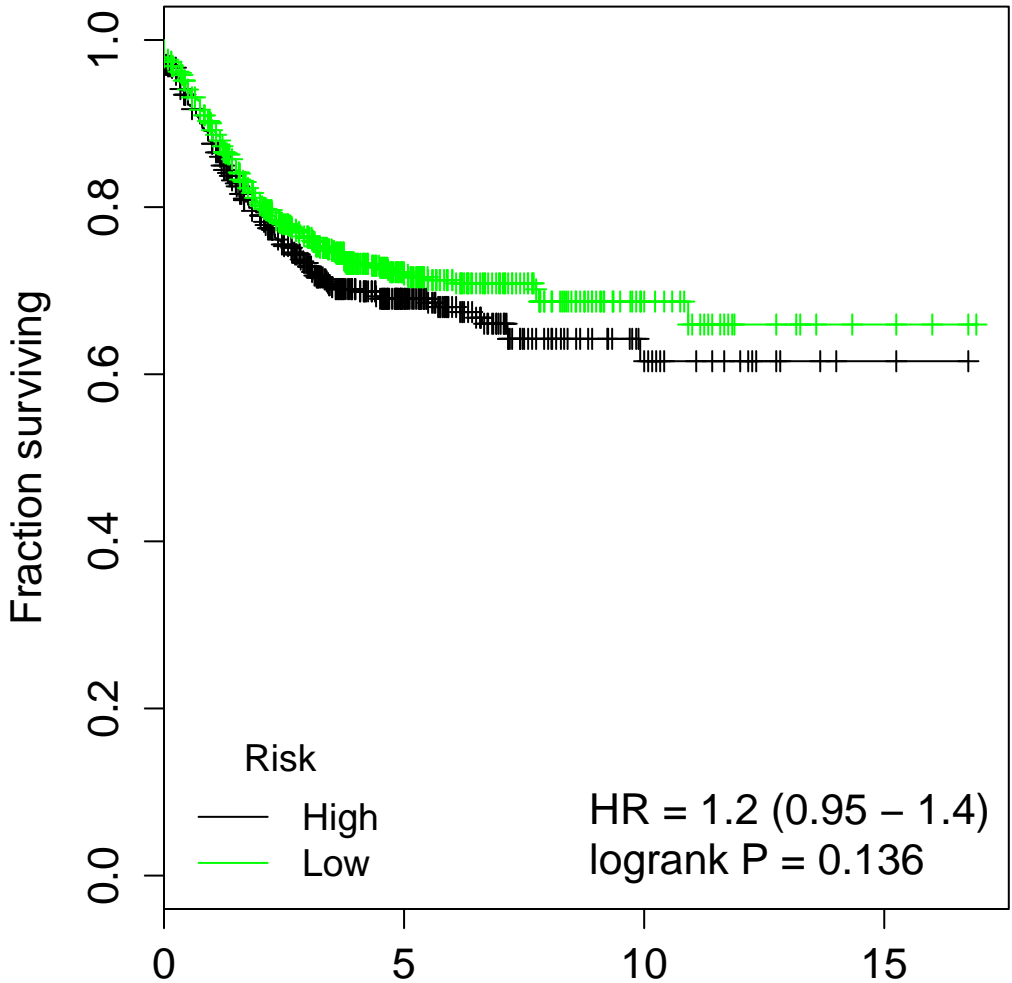

Number at risk

|      |     |     |    |   |
|------|-----|-----|----|---|
| High | 605 | 176 | 23 | 2 |
| Low  | 768 | 246 | 34 | 4 |

# TCA19

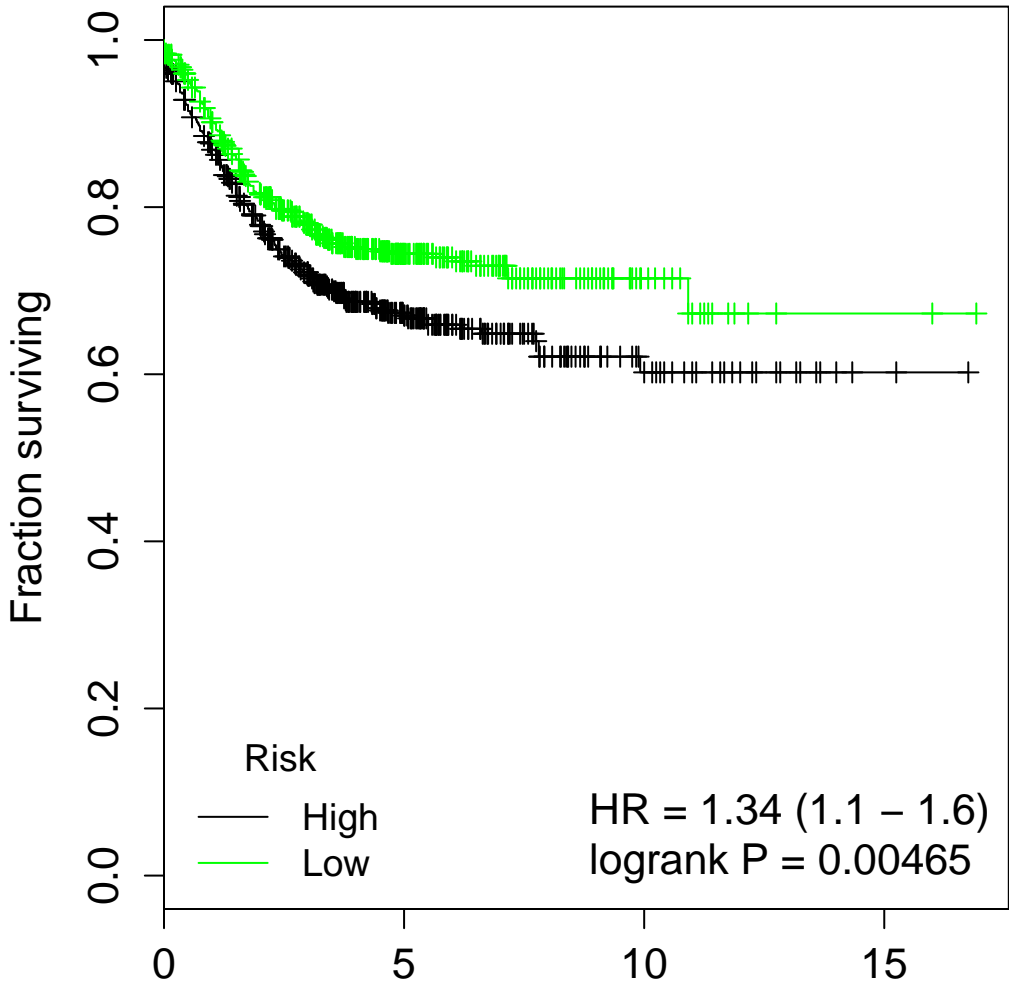

Number at risk

|      | 0   | 5   | 10 | 15 |
|------|-----|-----|----|----|
| High | 692 | 210 | 32 | 4  |
| Low  | 681 | 212 | 25 | 2  |

# V7RHS

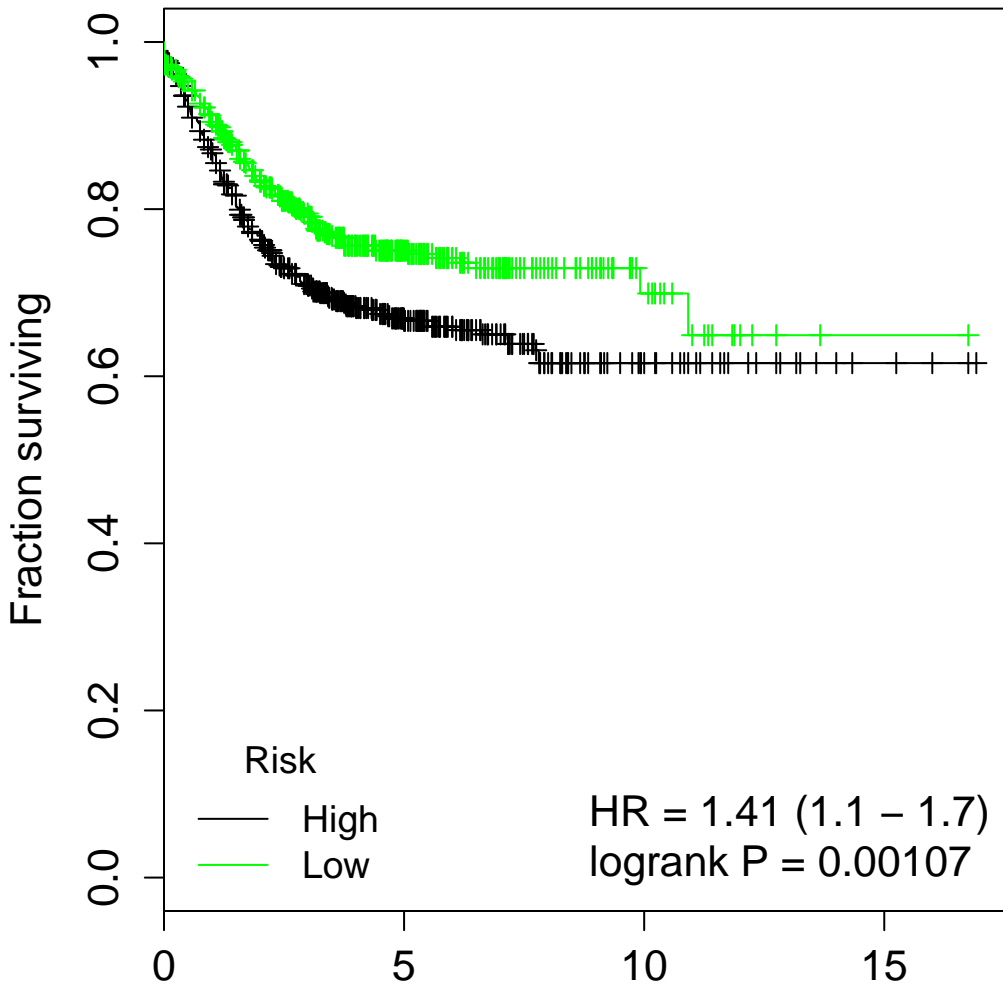

Number at risk

|      |     |     |    |   |
|------|-----|-----|----|---|
| High | 709 | 225 | 34 | 5 |
| Low  | 664 | 197 | 23 | 1 |

# Watanabe-CIN

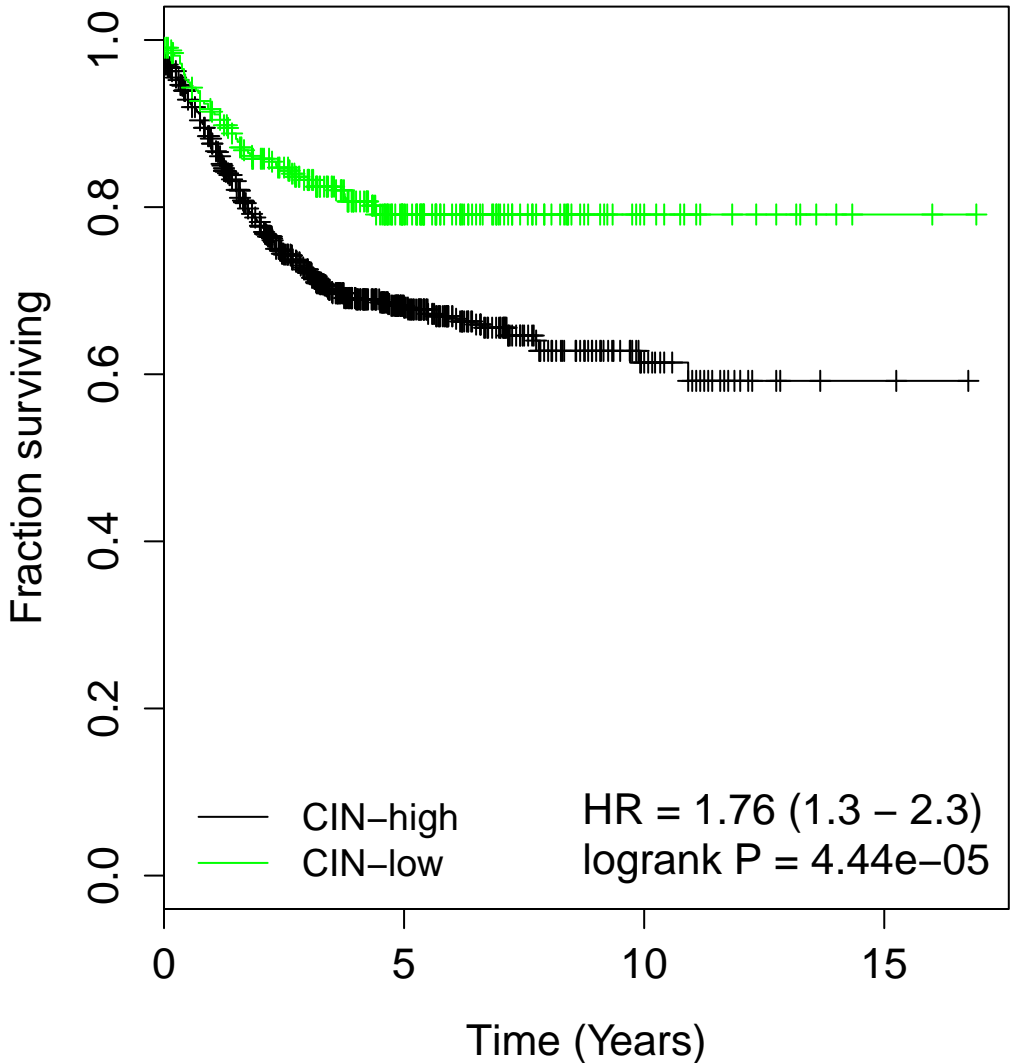

|          | Number at risk |     |    |   |
|----------|----------------|-----|----|---|
| CIN-high | 1050           | 304 | 40 | 4 |
| CIN-low  | 323            | 118 | 17 | 2 |



# Yuen3

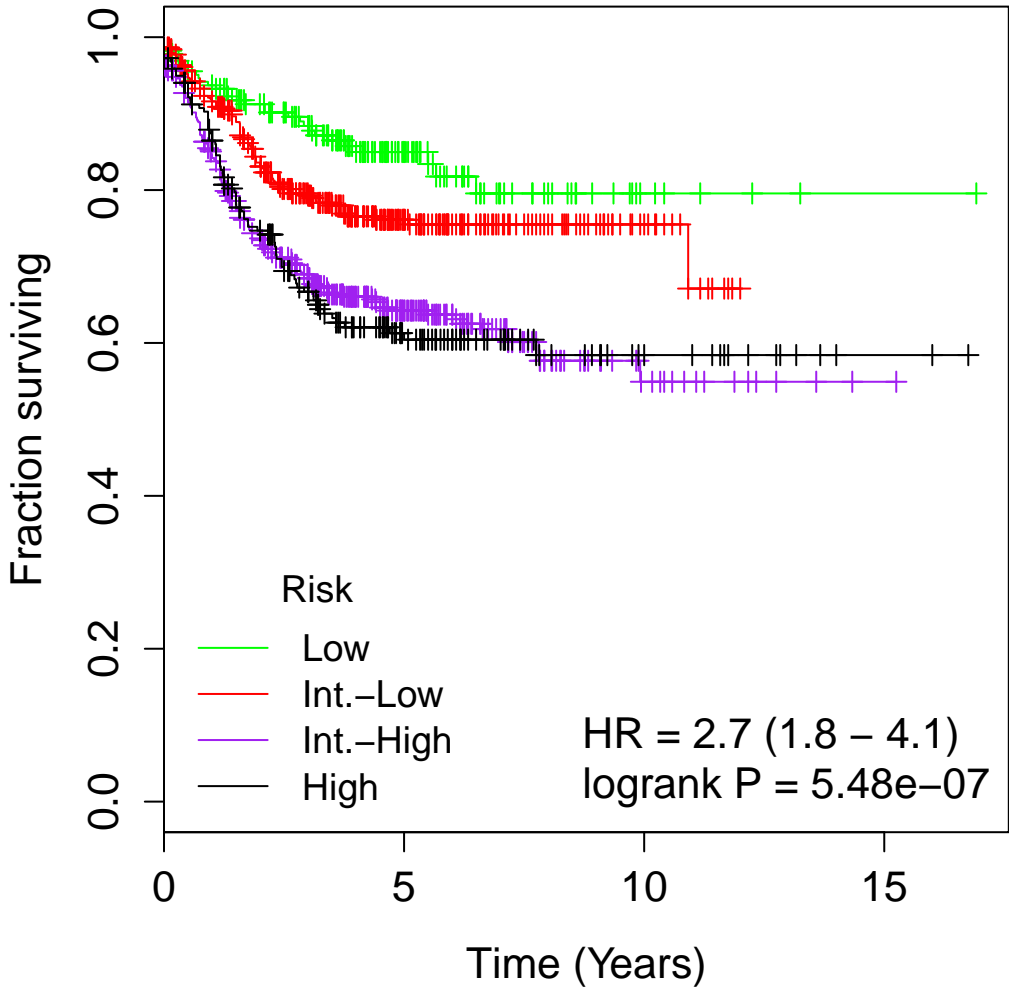

|           | Number at risk |     |    |   |
|-----------|----------------|-----|----|---|
| Low       | 229            | 70  | 6  | 1 |
| Int.-Low  | 442            | 134 | 17 | 0 |
| Int.-High | 483            | 147 | 18 | 2 |
| High      | 219            | 71  | 16 | 3 |
